# Supplementary material for: Identification and evaluation of circulating small extracellular vesicle microRNAs as diagnostic biomarkers for patients with indeterminate pulmonary nodules
Source: PubMed Central journal article supplement (PMC8976298; doi:10.1186/s12951-022-01366-0), 2022-04-02
Supplement: 12951_2022_1366_MOESM1_ESM.pdf [file 12951_2022_1366_MOESM1_ESM.pdf]

Figure S1

Patients with indeterminate pulmonary nodules detected by LDCT

Plasma sample collection, clinical record and pathological examination

**Included: 459**

- Patients with IPNs detected by LDCT
- Patients without previous cancer history
- Underwent surgical resection
- Able to collect blood samples and clinical information
- Signed written consents

Shanghai Pulmonary Hospital  
4/2019 - 5/2019

Benign (n = 20)  
Malignant (n = 179)

Shanghai Pulmonary Hospital  
9/2019 - 10/2019

Benign (n = 35)  
Malignant (n = 225)

**Excluded: 350**

- Hemolysis > 3 (107)
- Non-LUAD (65)
- Ratio of Benign : Malignant set to 1:2 (155)
- Failed in sequencing library construction (23)

**Training cohort**

Benign (n = 17)  
Malignant (n = 30)

**Testing cohort**

Benign (n = 24)  
Malignant (n = 38)

Figure S2

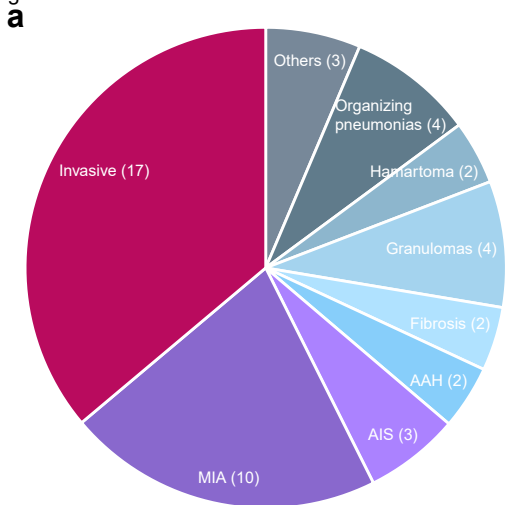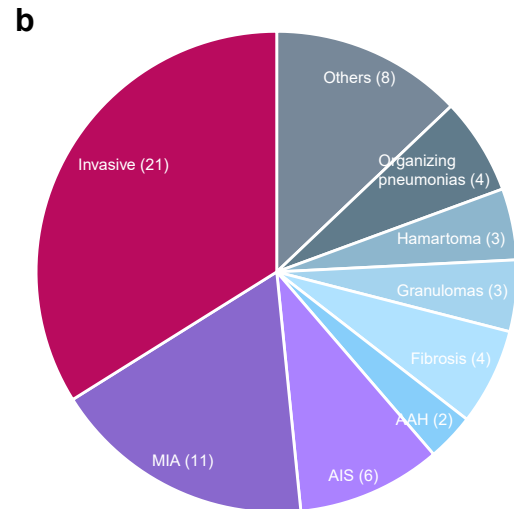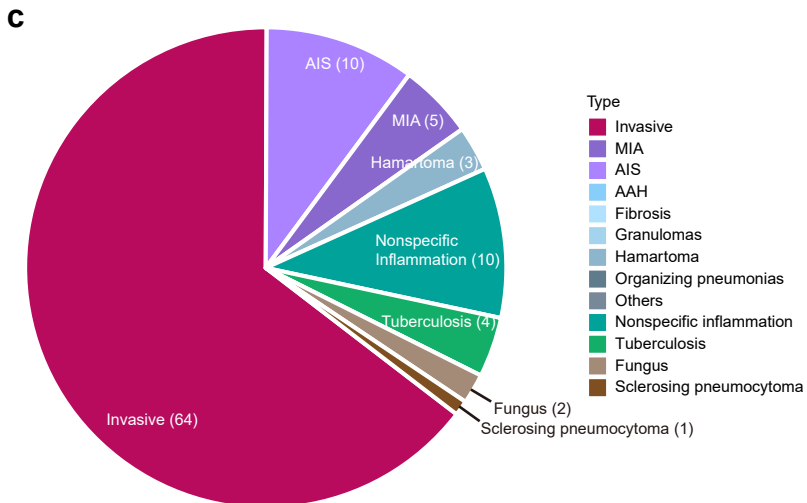

Figure S3

Benign

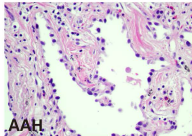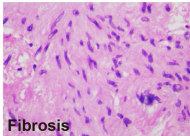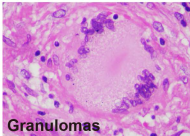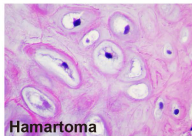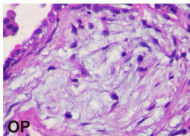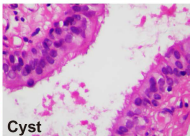

Malignant

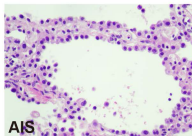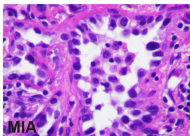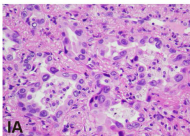

Figure S4

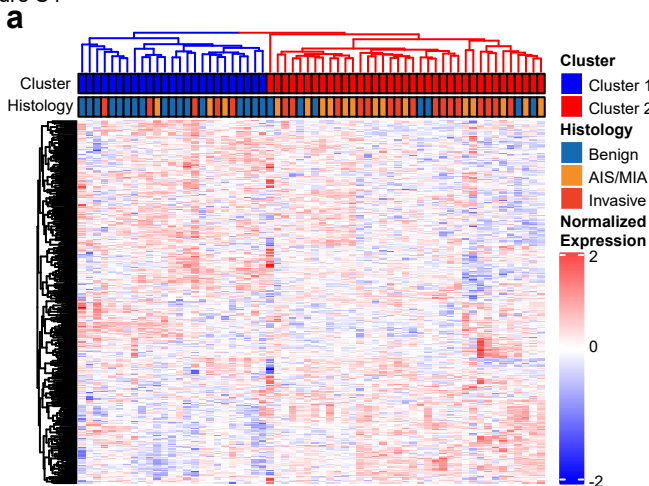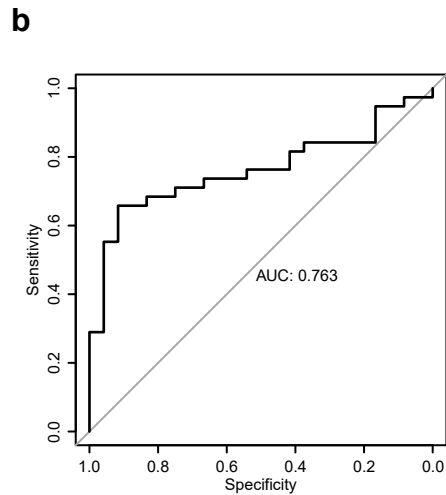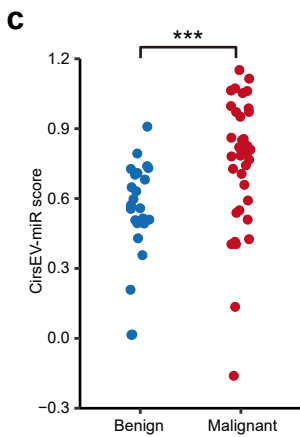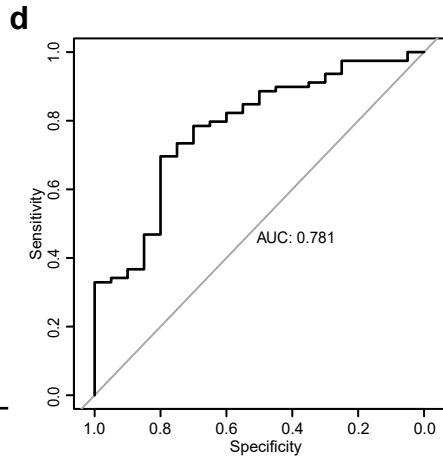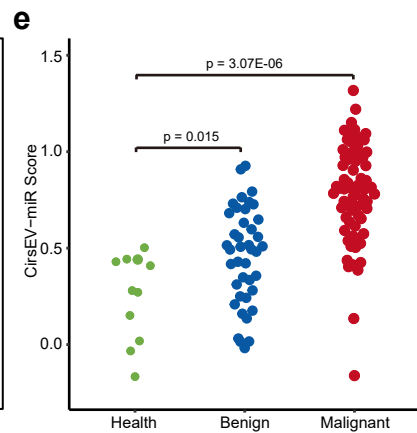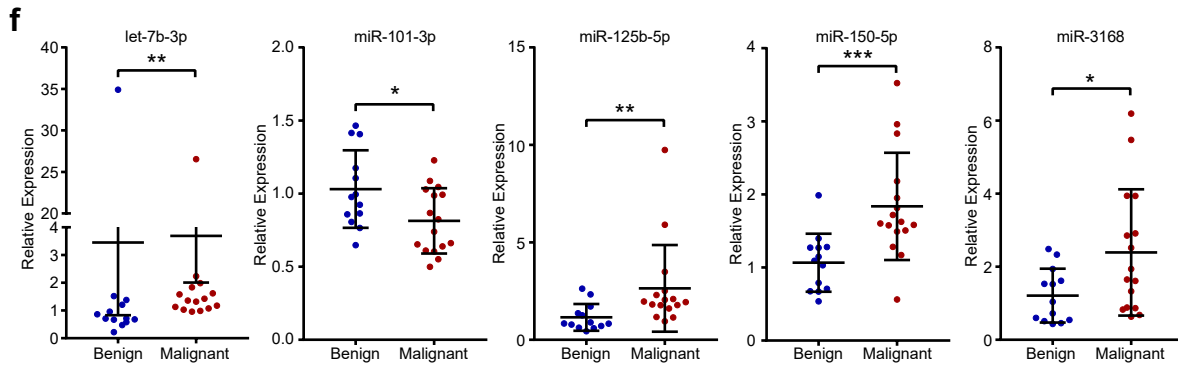

Figure S5

**a**

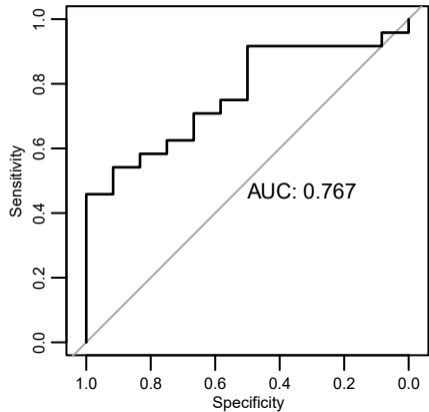

**b**

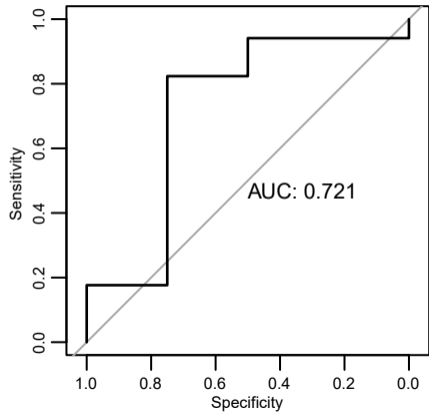

Table S1. Classifiers constructed from six identified DEMs.

| <b>Classifier</b> | <b>Elements</b>                                                      |
|-------------------|----------------------------------------------------------------------|
| One-miRNA         | let-7b-3p                                                            |
| Two-miRNA         | let-7b-3p, miR-125b-5p                                               |
| Three-miRNA       | let-7b-3p, miR-125b-5p, miR-197-3p                                   |
| Four-miRNA        | let-7b-3p, miR-125b-5p, miR-197-3p, miR-150-5p                       |
| Five-miRNA        | let-7b-3p, miR-125b-5p, miR-197-3p, miR-150-5p, miR-3168             |
| Six-miRNA         | let-7b-3p, miR-125b-5p, miR-197-3p, miR-150-5p, miR-3168, miR-101-3p |

Table S2. Performance of classifiers in the training and test cohorts.

| Classifier  | Training cohort |             |             | Testing cohort |             |             |
|-------------|-----------------|-------------|-------------|----------------|-------------|-------------|
|             | AUC             | Sensitivity | Specificity | AUC            | Sensitivity | Specificity |
| One-miRNA   | 0.875           | 0.667       | 1.000       | 0.680          | 0.737       | 0.583       |
| Two-miRNA   | 0.886           | 0.933       | 0.824       | 0.754          | 0.632       | 0.833       |
| Three-miRNA | 0.892           | 0.800       | 0.882       | 0.773          | 0.658       | 0.833       |
| Four-miRNA  | 0.882           | 0.800       | 0.882       | 0.720          | 0.684       | 0.792       |
| Five-miRNA  | 0.904           | 0.800       | 0.941       | 0.743          | 0.632       | 0.917       |
| Six-miRNA   | 0.794           | 0.833       | 0.706       | 0.729          | 0.684       | 0.833       |
| CirsEV-miR  | 0.920           | 0.900       | 0.882       | 0.763          | 0.658       | 0.917       |

Table S3. The five sEV-miRNAs and their corresponding coefficient in the CirsEV-miR model.

|             |             |
|-------------|-------------|
| Intercept   | -1.75739839 |
| let-7b-3p   | 0.28001472  |
| miR-101-3p  | -0.09222138 |
| miR-125b-5p | 0.12801717  |
| miR-150-5p  | 0.05133272  |
| miR-3168    | 0.06252532  |



Table S4. Target genes of the five sEV-miRNAs

| Gene Name | Gene Ensembl id | Tarbase Methods |
|-----------|-----------------|-----------------|
| SLK       | ENSG00000065613 | HITS-CLIP       |
| IRS2      | ENSG00000185950 | HITS-CLIP       |
| BRAF      | ENSG00000157764 | HITS-CLIP       |
| POU2F1    | ENSG00000143190 | PAR-CLIP        |
| CNOT6     | ENSG00000113300 | HITS-CLIP       |
| ASAH1     | ENSG00000104763 | HITS-CLIP       |
| GSK3B     | ENSG00000082701 | Multiple        |
| C5orf30   | ENSG00000181751 | HITS-CLIP       |
| CCAR2     | ENSG00000158941 | HITS-CLIP       |
| ERBB2IP   | ENSG00000112851 | HITS-CLIP       |
| TOB2      | ENSG00000183864 | HITS-CLIP       |
| LEPROTL1  | ENSG00000104660 | HITS-CLIP       |
| FEM1B     | ENSG00000169018 | HITS-CLIP       |
| TROVE2    | ENSG00000116747 | HITS-CLIP       |
| ZNF273    | ENSG00000198039 | Multiple        |
| ZNF616    | ENSG00000204611 | HITS-CLIP       |
| TTYH3     | ENSG00000136295 | HITS-CLIP       |
| ITGB1     | ENSG00000150093 | HITS-CLIP       |
| YAP1      | ENSG00000137693 | Multiple        |
| WASL      | ENSG00000106299 | HITS-CLIP       |
| CDS2      | ENSG00000101290 | HITS-CLIP       |
| ANGEL2    | ENSG00000174606 | HITS-CLIP       |
| STXBP5L   | ENSG00000145087 | HITS-CLIP       |
| RHOBTB3   | ENSG00000164292 | PAR-CLIP        |
| PTPLB     | ENSG00000206527 | HITS-CLIP       |
| NUCKS1    | ENSG00000069275 | HITS-CLIP       |
| TPM1      | ENSG00000140416 | HITS-CLIP       |
| USP25     | ENSG00000155313 | HITS-CLIP       |
| KBTBD8    | ENSG00000163376 | HITS-CLIP       |
| MGAT5     | ENSG00000152127 | HITS-CLIP       |
| ADORA2B   | ENSG00000170425 | HITS-CLIP       |
| CD59      | ENSG00000085063 | HITS-CLIP       |
| ELK4      | ENSG00000158711 | HITS-CLIP       |
| RAI1      | ENSG00000108557 | HITS-CLIP       |
| NUP153    | ENSG00000124789 | HITS-CLIP       |
| ARF3      | ENSG00000134287 | HITS-CLIP       |
| THBS1     | ENSG00000137801 | Multiple        |
| STOM      | ENSG00000148175 | Multiple        |
| LGR4      | ENSG00000205213 | HITS-CLIP       |
| ANKRD52   | ENSG00000139645 | HITS-CLIP       |
| LRRC8B    | ENSG00000197147 | HITS-CLIP       |

---

|          |                 |           |
|----------|-----------------|-----------|
| PAFAH1B1 | ENSG0000007168  | HITS-CLIP |
| NAP1L1   | ENSG00000187109 | HITS-CLIP |
| ZDHHC20  | ENSG00000180776 | HITS-CLIP |
| TMEM135  | ENSG00000166575 | HITS-CLIP |
| ALDH1A3  | ENSG00000184254 | HITS-CLIP |
| RABGAP1  | ENSG00000011454 | HITS-CLIP |
| TTC33    | ENSG00000113638 | HITS-CLIP |
| ARPP19   | ENSG00000128989 | HITS-CLIP |
| SPRED1   | ENSG00000166068 | HITS-CLIP |
| PTPN14   | ENSG00000152104 | HITS-CLIP |
| BACH1    | ENSG00000156273 | HITS-CLIP |
| ITCH     | ENSG00000078747 | HITS-CLIP |
| WAC      | ENSG00000095787 | Multiple  |
| DNAJB5   | ENSG00000137094 | HITS-CLIP |
| PBX1     | ENSG00000185630 | HITS-CLIP |
| IRGQ     | ENSG00000167378 | HITS-CLIP |
| BPTF     | ENSG00000171634 | HITS-CLIP |
| ITGA3    | ENSG00000005884 | HITS-CLIP |
| PLCL2    | ENSG00000154822 | HITS-CLIP |
| CCT4     | ENSG00000115484 | HITS-CLIP |
| VPS36    | ENSG00000136100 | HITS-CLIP |
| APPBP2   | ENSG00000062725 | HITS-CLIP |
| TMED5    | ENSG00000117500 | HITS-CLIP |
| RHPN2    | ENSG00000131941 | HITS-CLIP |
| PHB      | ENSG00000167085 | HITS-CLIP |
| HBP1     | ENSG00000105856 | HITS-CLIP |
| DSTYK    | ENSG00000133059 | HITS-CLIP |
| TPBG     | ENSG00000146242 | HITS-CLIP |
| ZC3H8    | ENSG00000144161 | PAR-CLIP  |
| ATP11B   | ENSG00000058063 | HITS-CLIP |
| RALBP1   | ENSG00000017797 | HITS-CLIP |
| KIF13A   | ENSG00000137177 | HITS-CLIP |
| PPP6C    | ENSG00000119414 | HITS-CLIP |
| DCUN1D4  | ENSG00000109184 | HITS-CLIP |
| MEF2D    | ENSG00000116604 | HITS-CLIP |
| MCU      | ENSG00000156026 | HITS-CLIP |
| RAB21    | ENSG00000080371 | HITS-CLIP |
| SETD5    | ENSG00000168137 | HITS-CLIP |
| ZNF736   | ENSG00000234444 | HITS-CLIP |
| OSBPL3   | ENSG00000070882 | HITS-CLIP |
| KPNA2    | ENSG00000182481 | HITS-CLIP |
| ZFHX3    | ENSG00000140836 | HITS-CLIP |
| ARF1     | ENSG00000143761 | HITS-CLIP |
| TMOD3    | ENSG00000138594 | HITS-CLIP |

---

---

|         |                 |           |
|---------|-----------------|-----------|
| NOTCH2  | ENSG00000134250 | HITS-CLIP |
| PTMS    | ENSG00000159335 | HITS-CLIP |
| GLS     | ENSG00000115419 | HITS-CLIP |
| VCL     | ENSG00000035403 | HITS-CLIP |
| ARFGEF2 | ENSG00000124198 | HITS-CLIP |
| PPP2R5C | ENSG00000078304 | HITS-CLIP |
| RHOA    | ENSG00000067560 | HITS-CLIP |
| SEC61A1 | ENSG00000058262 | HITS-CLIP |
| CACUL1  | ENSG00000151893 | HITS-CLIP |
| GTF2B   | ENSG00000137947 | HITS-CLIP |
| CHD7    | ENSG00000171316 | HITS-CLIP |
| MED17   | ENSG00000042429 | HITS-CLIP |
| PMP22   | ENSG00000109099 | HITS-CLIP |
| IPO7    | ENSG00000205339 | HITS-CLIP |
| DDX3X   | ENSG00000215301 | HITS-CLIP |
| RSRP1   | ENSG00000117616 | HITS-CLIP |
| FSTL1   | ENSG00000163430 | HITS-CLIP |
| MARK3   | ENSG00000075413 | HITS-CLIP |
| FKBP1A  | ENSG00000088832 | HITS-CLIP |
| CALM2   | ENSG00000143933 | HITS-CLIP |
| MTMR12  | ENSG00000150712 | HITS-CLIP |
| ASF1B   | ENSG00000105011 | HITS-CLIP |
| ZNF107  | ENSG00000196247 | HITS-CLIP |
| NCOA5   | ENSG00000124160 | HITS-CLIP |
| CDK2AP1 | ENSG00000111328 | HITS-CLIP |
| PDS5B   | ENSG00000083642 | Multiple  |
| APP     | ENSG00000142192 | Multiple  |
| CKAP5   | ENSG00000175216 | HITS-CLIP |
| TAOK1   | ENSG00000160551 | Multiple  |
| TAB3    | ENSG00000157625 | HITS-CLIP |
| KBTBD6  | ENSG00000165572 | HITS-CLIP |
| TMEM123 | ENSG00000152558 | HITS-CLIP |
| PLEKHA8 | ENSG00000106086 | HITS-CLIP |
| RNF220  | ENSG00000187147 | HITS-CLIP |
| RPS6KA5 | ENSG00000100784 | HITS-CLIP |
| TNRC6B  | ENSG00000100354 | HITS-CLIP |
| ZSWIM6  | ENSG00000130449 | HITS-CLIP |
| PTER    | ENSG00000165983 | HITS-CLIP |
| ZNF548  | ENSG00000188785 | HITS-CLIP |
| PRDM1   | ENSG00000057657 | HITS-CLIP |
| TMEM66  | ENSG00000133872 | HITS-CLIP |
| ETV5    | ENSG00000244405 | HITS-CLIP |
| ASAP1   | ENSG00000153317 | HITS-CLIP |
| SLC7A1  | ENSG00000139514 | HITS-CLIP |

---

---

|          |                 |           |
|----------|-----------------|-----------|
| ICE1     | ENSG00000164151 | HITS-CLIP |
| FOXP1    | ENSG00000114861 | HITS-CLIP |
| TES      | ENSG00000135269 | HITS-CLIP |
| ZBTB37   | ENSG00000185278 | HITS-CLIP |
| LYPD3    | ENSG00000124466 | HITS-CLIP |
| ETNK1    | ENSG00000139163 | HITS-CLIP |
| PEG10    | ENSG00000242265 | HITS-CLIP |
| ZNF217   | ENSG00000171940 | HITS-CLIP |
| ITGAV    | ENSG00000138448 | HITS-CLIP |
| LARP4B   | ENSG00000107929 | HITS-CLIP |
| CROT     | ENSG00000005469 | HITS-CLIP |
| PSD3     | ENSG00000156011 | HITS-CLIP |
| RNF145   | ENSG00000145860 | HITS-CLIP |
| GPR37    | ENSG00000170775 | HITS-CLIP |
| NFAT5    | ENSG00000102908 | HITS-CLIP |
| PPP1R12A | ENSG00000058272 | HITS-CLIP |
| TET3     | ENSG00000187605 | HITS-CLIP |
| KLHDC10  | ENSG00000128607 | PAR-CLIP  |
| SLC5A3   | ENSG00000198743 | HITS-CLIP |
| HNRNPAB  | ENSG00000197451 | HITS-CLIP |
| CLIP1    | ENSG00000130779 | HITS-CLIP |
| PHC3     | ENSG00000173889 | HITS-CLIP |
| FBN1     | ENSG00000166147 | HITS-CLIP |
| ATP6AP2  | ENSG00000182220 | HITS-CLIP |
| FNDC3B   | ENSG00000075420 | HITS-CLIP |
| CTNNB1   | ENSG00000168036 | HITS-CLIP |
| PUM1     | ENSG00000134644 | Multiple  |
| ACTR3    | ENSG00000115091 | Multiple  |
| GFPT1    | ENSG00000198380 | Multiple  |
| FAR1     | ENSG00000197601 | HITS-CLIP |
| WWC3     | ENSG00000047644 | HITS-CLIP |
| NUFIP2   | ENSG00000108256 | Multiple  |
| ST8SIA4  | ENSG00000113532 | Multiple  |
| DYNC1LI2 | ENSG00000135720 | Multiple  |
| VPS37A   | ENSG00000155975 | HITS-CLIP |
| UBE3A    | ENSG00000114062 | Multiple  |
| ATL2     | ENSG00000119787 | HITS-CLIP |
| HERC2    | ENSG00000128731 | HITS-CLIP |
| CSNK1A1  | ENSG00000113712 | HITS-CLIP |
| CREBRF   | ENSG00000164463 | HITS-CLIP |
| MYC      | ENSG00000136997 | Multiple  |
| TEX30    | ENSG00000151287 | HITS-CLIP |
| DEDD     | ENSG00000158796 | HITS-CLIP |
| NR4A3    | ENSG00000119508 | HITS-CLIP |

---

---

|          |                 |           |
|----------|-----------------|-----------|
| AHCTF1   | ENSG00000153207 | HITS-CLIP |
| AHDC1    | ENSG00000126705 | HITS-CLIP |
| CCL7     | ENSG00000108688 | HITS-CLIP |
| KLF3     | ENSG00000109787 | HITS-CLIP |
| ARID1A   | ENSG00000117713 | HITS-CLIP |
| TFRC     | ENSG00000072274 | HITS-CLIP |
| RNF34    | ENSG00000170633 | HITS-CLIP |
| RPS16    | ENSG00000105193 | HITS-CLIP |
| SETD8    | ENSG00000183955 | HITS-CLIP |
| ZC3H12C  | ENSG00000149289 | HITS-CLIP |
| ECT2     | ENSG00000114346 | HITS-CLIP |
| SET      | ENSG00000119335 | HITS-CLIP |
| SLC38A2  | ENSG00000134294 | HITS-CLIP |
| RNF19A   | ENSG00000034677 | HITS-CLIP |
| RAB11A   | ENSG00000103769 | HITS-CLIP |
| RAB18    | ENSG00000099246 | HITS-CLIP |
| FOSL2    | ENSG00000075426 | Multiple  |
| C5orf51  | ENSG00000205765 | HITS-CLIP |
| PTGS2    | ENSG00000073756 | HITS-CLIP |
| PABPC1   | ENSG00000070756 | HITS-CLIP |
| RBM47    | ENSG00000163694 | HITS-CLIP |
| CSNK2A1  | ENSG00000101266 | HITS-CLIP |
| TMPO     | ENSG00000120802 | HITS-CLIP |
| FAM3C    | ENSG00000196937 | HITS-CLIP |
| OTUD4    | ENSG00000164164 | HITS-CLIP |
| DNAJB14  | ENSG00000164031 | HITS-CLIP |
| FSCN1    | ENSG00000075618 | Multiple  |
| TRIO     | ENSG00000038382 | HITS-CLIP |
| CS       | ENSG00000062485 | HITS-CLIP |
| RDH10    | ENSG00000121039 | Multiple  |
| TSC22D2  | ENSG00000196428 | Multiple  |
| PDCL     | ENSG00000136940 | HITS-CLIP |
| IGF2BP3  | ENSG00000136231 | HITS-CLIP |
| ZC3H11A  | ENSG00000058673 | HITS-CLIP |
| ADNP     | ENSG00000101126 | HITS-CLIP |
| CCNY     | ENSG00000108100 | HITS-CLIP |
| CD2BP2   | ENSG00000169217 | HITS-CLIP |
| FGF5     | ENSG00000138675 | HITS-CLIP |
| YY1      | ENSG00000100811 | HITS-CLIP |
| ARID5B   | ENSG00000150347 | Multiple  |
| COL1A2   | ENSG00000164692 | HITS-CLIP |
| SSR3     | ENSG00000114850 | HITS-CLIP |
| UBE2O    | ENSG00000175931 | HITS-CLIP |
| ARHGAP29 | ENSG00000137962 | HITS-CLIP |

---

---

|           |                 |           |
|-----------|-----------------|-----------|
| ARRDC3    | ENSG00000113369 | HITS-CLIP |
| NFE2L2    | ENSG00000116044 | HITS-CLIP |
| UBE2H     | ENSG00000186591 | HITS-CLIP |
| PRKAR1A   | ENSG00000108946 | HITS-CLIP |
| AMOTL2    | ENSG00000114019 | HITS-CLIP |
| MGEA5     | ENSG00000198408 | Multiple  |
| PUM2      | ENSG00000055917 | Multiple  |
| ATXN7L3B  | ENSG00000253719 | HITS-CLIP |
| AHR       | ENSG00000106546 | HITS-CLIP |
| REV3L     | ENSG00000009413 | HITS-CLIP |
| GOLGA1    | ENSG00000136935 | HITS-CLIP |
| MAGI1     | ENSG00000151276 | HITS-CLIP |
| EPM2AIP1  | ENSG00000178567 | PAR-CLIP  |
| RBBP7     | ENSG00000102054 | HITS-CLIP |
| SOD2      | ENSG00000112096 | Multiple  |
| AKAP13    | ENSG00000170776 | HITS-CLIP |
| PJA2      | ENSG00000198961 | HITS-CLIP |
| RTF1      | ENSG00000137815 | HITS-CLIP |
| UBR7      | ENSG00000012963 | HITS-CLIP |
| RLF       | ENSG00000117000 | HITS-CLIP |
| FGD4      | ENSG00000139132 | HITS-CLIP |
| BASP1     | ENSG00000176788 | HITS-CLIP |
| RAB22A    | ENSG00000124209 | HITS-CLIP |
| ENPP5     | ENSG00000112796 | HITS-CLIP |
| PPIP5K2   | ENSG00000145725 | HITS-CLIP |
| USP9X     | ENSG00000124486 | HITS-CLIP |
| WDR43     | ENSG00000163811 | HITS-CLIP |
| HNRNPA2B1 | ENSG00000122566 | HITS-CLIP |
| HIPK1     | ENSG00000163349 | HITS-CLIP |
| RAB11B    | ENSG00000185236 | Multiple  |
| KCTD15    | ENSG00000153885 | HITS-CLIP |
| ZNF367    | ENSG00000165244 | PAR-CLIP  |
| TSN       | ENSG00000211460 | HITS-CLIP |
| ZDHHC17   | ENSG00000186908 | HITS-CLIP |
| NCKAP1    | ENSG00000061676 | Multiple  |
| KHNYN     | ENSG00000100441 | HITS-CLIP |
| CTDSPL2   | ENSG00000137770 | HITS-CLIP |
| HEBP2     | ENSG00000051620 | HITS-CLIP |
| CLDN12    | ENSG00000157224 | HITS-CLIP |
| ITGA6     | ENSG00000091409 | HITS-CLIP |
| VAV3      | ENSG00000134215 | HITS-CLIP |
| LSM14B    | ENSG00000149657 | HITS-CLIP |
| CPEB3     | ENSG00000107864 | HITS-CLIP |
| ZC3H4     | ENSG00000130749 | HITS-CLIP |

---

---

|           |                 |           |
|-----------|-----------------|-----------|
| 6-Mar     | ENSG00000145495 | HITS-CLIP |
| RAD21     | ENSG00000164754 | HITS-CLIP |
| ESRP1     | ENSG00000104413 | HITS-CLIP |
| SCARB2    | ENSG00000138760 | HITS-CLIP |
| KMT2C     | ENSG00000055609 | HITS-CLIP |
| BTG1      | ENSG00000133639 | Multiple  |
| SLFN5     | ENSG00000166750 | HITS-CLIP |
| PAR6B     | ENSG00000124171 | HITS-CLIP |
| SLC23A2   | ENSG00000089057 | HITS-CLIP |
| DIS3      | ENSG00000083520 | HITS-CLIP |
| C20orf194 | ENSG00000088854 | HITS-CLIP |
| KLF6      | ENSG00000067082 | HITS-CLIP |
| GPR176    | ENSG00000166073 | HITS-CLIP |
| CBX5      | ENSG00000094916 | Multiple  |
| SETX      | ENSG00000107290 | Multiple  |
| C3orf52   | ENSG00000114529 | HITS-CLIP |
| RAB14     | ENSG00000119396 | Multiple  |
| TFG       | ENSG00000114354 | PAR-CLIP  |
| GOLIM4    | ENSG00000173905 | HITS-CLIP |
| UGDH      | ENSG00000109814 | HITS-CLIP |
| NIN       | ENSG00000100503 | HITS-CLIP |
| N4BP1     | ENSG00000102921 | HITS-CLIP |
| BMP2R     | ENSG00000204217 | HITS-CLIP |
| ARHGAP12  | ENSG00000165322 | HITS-CLIP |
| BCL2L11   | ENSG00000153094 | HITS-CLIP |
| ERLEC1    | ENSG00000068912 | HITS-CLIP |
| TFAM      | ENSG00000108064 | HITS-CLIP |
| COL4A1    | ENSG00000187498 | HITS-CLIP |
| SYNCRIP   | ENSG00000135316 | HITS-CLIP |
| ASAP2     | ENSG00000151693 | Multiple  |
| INO80D    | ENSG00000114933 | HITS-CLIP |
| EFNA1     | ENSG00000169242 | HITS-CLIP |
| ZNF670    | ENSG00000277462 | HITS-CLIP |
| MARCKS    | ENSG00000277443 | HITS-CLIP |
| MLLT6     | ENSG00000275023 | HITS-CLIP |
| ARHGAP1   | ENSG00000175220 | HITS-CLIP |
| RNF41     | ENSG00000181852 | PAR-CLIP  |
| CCNT2     | ENSG00000082258 | Multiple  |
| VAPB      | ENSG00000124164 | HITS-CLIP |
| B2M       | ENSG00000166710 | HITS-CLIP |
| CELF2     | ENSG00000048740 | HITS-CLIP |
| SRRT      | ENSG00000087087 | HITS-CLIP |
| RNF114    | ENSG00000124226 | HITS-CLIP |
| HSPA13    | ENSG00000155304 | PAR-CLIP  |

---

---

|         |                 |           |
|---------|-----------------|-----------|
| RNF11   | ENSG00000123091 | Multiple  |
| POU2F1  | ENSG00000143190 | Multiple  |
| ANP32E  | ENSG00000143401 | Multiple  |
| FASN    | ENSG00000169710 | HITS-CLIP |
| CCNG1   | ENSG00000113328 | PAR-CLIP  |
| EIF3L   | ENSG00000100129 | PAR-CLIP  |
| SLC38A1 | ENSG00000111371 | HITS-CLIP |
| LONRF3  | ENSG00000175556 | Multiple  |
| PRLR    | ENSG00000113494 | HITS-CLIP |
| PPP1R2  | ENSG00000184203 | Multiple  |
| NEK7    | ENSG00000151414 | Multiple  |
| MSI2    | ENSG00000153944 | HITS-CLIP |
| TENM3   | ENSG00000218336 | HITS-CLIP |
| SEC16A  | ENSG00000148396 | HITS-CLIP |
| FOS     | ENSG00000170345 | HITS-CLIP |
| PDLIM5  | ENSG00000163110 | HITS-CLIP |
| MLK4    | ENSG00000143674 | Multiple  |
| ZMAT3   | ENSG00000172667 | PAR-CLIP  |
| NETO2   | ENSG00000171208 | PAR-CLIP  |
| CNOT6   | ENSG00000113300 | PAR-CLIP  |
| BICD2   | ENSG00000185963 | Multiple  |
| GSK3B   | ENSG00000082701 | PAR-CLIP  |
| RNF44   | ENSG00000146083 | PAR-CLIP  |
| RBM25   | ENSG00000119707 | Multiple  |
| ARAP2   | ENSG00000047365 | PAR-CLIP  |
| FBXL3   | ENSG00000005812 | PAR-CLIP  |
| WAPAL   | ENSG00000062650 | HITS-CLIP |
| PKIA    | ENSG00000171033 | PAR-CLIP  |
| RBL2    | ENSG00000103479 | PAR-CLIP  |
| DAZAP2  | ENSG00000183283 | PAR-CLIP  |
| ITPRIP  | ENSG00000148841 | HITS-CLIP |
| AVPI1   | ENSG00000119986 | PAR-CLIP  |
| RBM27   | ENSG00000091009 | HITS-CLIP |
| VWA9    | ENSG00000138614 | PAR-CLIP  |
| UGCG    | ENSG00000148154 | HITS-CLIP |
| TNPO1   | ENSG00000083312 | Multiple  |
| EFCAB14 | ENSG00000159658 | Multiple  |
| UBE2Z   | ENSG00000159202 | Multiple  |
| TVP23B  | ENSG00000171928 | HITS-CLIP |
| ZNF283  | ENSG00000167637 | PAR-CLIP  |
| CDH2    | ENSG00000170558 | PAR-CLIP  |
| G3BP1   | ENSG00000145907 | PAR-CLIP  |
| HSPA1A  | ENSG00000204389 | Multiple  |
| RPS23   | ENSG00000186468 | PAR-CLIP  |

---



---

|                  |                 |           |
|------------------|-----------------|-----------|
| PDCD4            | ENSG00000150593 | HITS-CLIP |
| MASTL            | ENSG00000120539 | PAR-CLIP  |
| ADAM10           | ENSG00000137845 | HITS-CLIP |
| KL               | ENSG00000133116 | Multiple  |
| EMP1             | ENSG00000134531 | HITS-CLIP |
| OTUD3            | ENSG00000169914 | Multiple  |
| DSC2             | ENSG00000134755 | HITS-CLIP |
| IRF4             | ENSG00000137265 | PAR-CLIP  |
| PDHX             | ENSG00000110435 | HITS-CLIP |
| RAP2B            | ENSG00000181467 | Multiple  |
| TCP11L2          | ENSG00000166046 | HITS-CLIP |
| GTF2E2           | ENSG00000197265 | Multiple  |
| MEGF9            | ENSG00000106780 | HITS-CLIP |
| UBP1             | ENSG00000153560 | HITS-CLIP |
| RP4-695O20__B.10 | ENSG00000197182 | PAR-CLIP  |
| ANO6             | ENSG00000177119 | HITS-CLIP |
| RPL17            | ENSG00000265681 | PAR-CLIP  |
| GRAMD1B          | ENSG00000023171 | PAR-CLIP  |
| NUP62            | ENSG00000213024 | Multiple  |
| BCL9             | ENSG00000116128 | PAR-CLIP  |
| CIC              | ENSG00000079432 | Multiple  |
| FBXL5            | ENSG00000118564 | PAR-CLIP  |
| ZBED4            | ENSG00000100426 | PAR-CLIP  |
| TPD52            | ENSG00000076554 | Multiple  |
| AREL1            | ENSG00000119682 | PAR-CLIP  |
| ATXN7L3          | ENSG00000087152 | HITS-CLIP |
| FHL1             | ENSG00000022267 | PAR-CLIP  |
| ZBTB38           | ENSG00000177311 | HITS-CLIP |
| PLA2R1           | ENSG00000153246 | HITS-CLIP |
| PLEC             | ENSG00000178209 | HITS-CLIP |
| ANKRD11          | ENSG00000167522 | PAR-CLIP  |
| ITGB8            | ENSG00000105855 | Multiple  |
| NUCKS1           | ENSG00000069275 | Multiple  |
| CLASP2           | ENSG00000163539 | Multiple  |
| UBAC2            | ENSG00000134882 | HITS-CLIP |
| ZNF12            | ENSG00000164631 | Multiple  |
| RAD23B           | ENSG00000119318 | Multiple  |
| SMAD2            | ENSG00000175387 | PAR-CLIP  |
| CAMSAP1          | ENSG00000130559 | PAR-CLIP  |
| SKOR1            | ENSG00000188779 | HITS-CLIP |
| DICER1           | ENSG00000100697 | Multiple  |
| CBX2             | ENSG00000173894 | HITS-CLIP |
| DNM2             | ENSG00000079805 | HITS-CLIP |
| EN2              | ENSG00000164778 | PAR-CLIP  |

---

---

|              |                 |           |
|--------------|-----------------|-----------|
| SCAI         | ENSG00000173611 | PAR-CLIP  |
| MAST4        | ENSG00000069020 | HITS-CLIP |
| TMEM33       | ENSG00000109133 | Multiple  |
| CBFA2T2      | ENSG00000078699 | Multiple  |
| MMGT1        | ENSG00000169446 | PAR-CLIP  |
| NRAS         | ENSG00000213281 | HITS-CLIP |
| DNAJC3       | ENSG00000102580 | HITS-CLIP |
| LPHN2        | ENSG00000117114 | Multiple  |
| HN1          | ENSG00000189159 | Multiple  |
| MTHFD2       | ENSG00000065911 | Multiple  |
| THUMPD3      | ENSG00000134077 | PAR-CLIP  |
| PPP2R3A      | ENSG00000073711 | HITS-CLIP |
| MAP7D3       | ENSG00000129680 | PAR-CLIP  |
| PRRC1        | ENSG00000164244 | PAR-CLIP  |
| CD38         | ENSG00000004468 | PAR-CLIP  |
| CHST15       | ENSG00000182022 | HITS-CLIP |
| CLIC4        | ENSG00000169504 | HITS-CLIP |
| COPS8        | ENSG00000198612 | PAR-CLIP  |
| MSMO1        | ENSG00000052802 | PAR-CLIP  |
| KBTBD2       | ENSG00000170852 | Multiple  |
| CHD1         | ENSG00000153922 | PAR-CLIP  |
| KIF1B        | ENSG00000054523 | PAR-CLIP  |
| ABT1         | ENSG00000146109 | Multiple  |
| SPPL2A       | ENSG00000138600 | HITS-CLIP |
| TMED7-TICAM2 | ENSG00000251201 | PAR-CLIP  |
| RAB3D        | ENSG00000105514 | HITS-CLIP |
| DR1          | ENSG00000117505 | HITS-CLIP |
| FAM78A       | ENSG00000126882 | PAR-CLIP  |
| EXOC5        | ENSG00000070367 | HITS-CLIP |
| FBXO30       | ENSG00000118496 | Multiple  |
| ERO1L        | ENSG00000197930 | Multiple  |
| C16orf87     | ENSG00000155330 | PAR-CLIP  |
| FAM115A      | ENSG00000198420 | HITS-CLIP |
| YOD1         | ENSG00000180667 | Multiple  |
| HEATR6       | ENSG00000068097 | Multiple  |
| TMED7        | ENSG00000134970 | PAR-CLIP  |
| SMAD9        | ENSG00000120693 | PAR-CLIP  |
| RRN3         | ENSG00000085721 | PAR-CLIP  |
| SLC25A3      | ENSG00000075415 | Multiple  |
| SOX11        | ENSG00000176887 | HITS-CLIP |
| PTPN9        | ENSG00000169410 | PAR-CLIP  |
| CRK          | ENSG00000167193 | HITS-CLIP |
| KIAA1598     | ENSG00000187164 | HITS-CLIP |
| FBXW7        | ENSG00000109670 | Multiple  |

---

---

|          |                 |           |
|----------|-----------------|-----------|
| GATA3    | ENSG00000107485 | Multiple  |
| TRIM37   | ENSG00000108395 | Multiple  |
| COL12A1  | ENSG00000111799 | HITS-CLIP |
| TRIAP1   | ENSG00000170855 | PAR-CLIP  |
| ARRDC4   | ENSG00000140450 | HITS-CLIP |
| THBS1    | ENSG00000137801 | HITS-CLIP |
| RUNX1    | ENSG00000159216 | PAR-CLIP  |
| TMEM167A | ENSG00000174695 | Multiple  |
| RPL3     | ENSG00000100316 | PAR-CLIP  |
| MTMR6    | ENSG00000139505 | PAR-CLIP  |
| VANGL1   | ENSG00000173218 | PAR-CLIP  |
| PHACTR2  | ENSG00000112419 | HITS-CLIP |
| UBTD2    | ENSG00000168246 | PAR-CLIP  |
| OPN3     | ENSG00000054277 | PAR-CLIP  |
| AGO3     | ENSG00000126070 | Multiple  |
| PIP5K1C  | ENSG00000186111 | Multiple  |
| MEX3B    | ENSG00000183496 | PAR-CLIP  |
| CLCN3    | ENSG00000109572 | HITS-CLIP |
| PAK2     | ENSG00000180370 | HITS-CLIP |
| C11orf30 | ENSG00000158636 | Multiple  |
| SAMD8    | ENSG00000156671 | PAR-CLIP  |
| PVRL2    | ENSG00000130202 | HITS-CLIP |
| SRP19    | ENSG00000153037 | HITS-CLIP |
| SPATA2   | ENSG00000158480 | Multiple  |
| TADA2B   | ENSG00000173011 | Multiple  |
| ELK3     | ENSG00000111145 | Multiple  |
| SETD7    | ENSG00000145391 | Multiple  |
| LMNB2    | ENSG00000176619 | Multiple  |
| USP37    | ENSG00000135913 | Multiple  |
| SEL1L    | ENSG00000071537 | HITS-CLIP |
| FAM175A  | ENSG00000163322 | PAR-CLIP  |
| CPEB4    | ENSG00000113742 | PAR-CLIP  |
| HABP4    | ENSG00000130956 | PAR-CLIP  |
| EXTL3    | ENSG00000012232 | HITS-CLIP |
| COPS7B   | ENSG00000144524 | HITS-CLIP |
| EXPH5    | ENSG00000110723 | PAR-CLIP  |
| DIDO1    | ENSG00000101191 | Multiple  |
| UBQLN1   | ENSG00000135018 | HITS-CLIP |
| IFNGR2   | ENSG00000159128 | Multiple  |
| CSNK1G3  | ENSG00000151292 | HITS-CLIP |
| PURA     | ENSG00000185129 | PAR-CLIP  |
| TEP1     | ENSG00000129566 | HITS-CLIP |
| CYP51A1  | ENSG00000001630 | Multiple  |
| PAFAH1B1 | ENSG00000007168 | Multiple  |

---

---

|          |                 |           |
|----------|-----------------|-----------|
| ATAD1    | ENSG00000138138 | HITS-CLIP |
| SLTM     | ENSG00000137776 | HITS-CLIP |
| NAP1L1   | ENSG00000187109 | Multiple  |
| GCLM     | ENSG00000023909 | PAR-CLIP  |
| SGPL1    | ENSG00000166224 | PAR-CLIP  |
| REEP3    | ENSG00000165476 | Multiple  |
| YWHAG    | ENSG00000170027 | HITS-CLIP |
| SEC23A   | ENSG00000100934 | HITS-CLIP |
| PPP1CC   | ENSG00000186298 | Multiple  |
| MCL1     | ENSG00000143384 | Multiple  |
| PTPN4    | ENSG00000088179 | HITS-CLIP |
| MAPK14   | ENSG00000112062 | HITS-CLIP |
| GNA13    | ENSG00000120063 | Multiple  |
| CCND2    | ENSG00000118971 | HITS-CLIP |
| NDNL2    | ENSG00000185115 | PAR-CLIP  |
| ADAT1    | ENSG00000065457 | HITS-CLIP |
| TSPAN3   | ENSG00000140391 | PAR-CLIP  |
| ZNF260   | ENSG00000254004 | Multiple  |
| MKL2     | ENSG00000186260 | Multiple  |
| HNRNPDL  | ENSG00000152795 | PAR-CLIP  |
| HOXA9    | ENSG00000078399 | Multiple  |
| TM9SF3   | ENSG00000077147 | PAR-CLIP  |
| RC3H2    | ENSG00000056586 | Multiple  |
| MTMR4    | ENSG00000108389 | HITS-CLIP |
| HNRNPF   | ENSG00000169813 | Multiple  |
| NIP7     | ENSG00000132603 | PAR-CLIP  |
| PGM2     | ENSG00000169299 | HITS-CLIP |
| ZNF850   | ENSG00000267041 | PAR-CLIP  |
| BRIP1    | ENSG00000136492 | HITS-CLIP |
| ARHGAP17 | ENSG00000140750 | PAR-CLIP  |
| SYPL1    | ENSG00000008282 | Multiple  |
| BACH1    | ENSG00000156273 | Multiple  |
| SAMSN1   | ENSG00000155307 | PAR-CLIP  |
| CPSF2    | ENSG00000165934 | Multiple  |
| GNG12    | ENSG00000172380 | PAR-CLIP  |
| HUWE1    | ENSG00000086758 | Multiple  |
| FRS2     | ENSG00000166225 | HITS-CLIP |
| CBX4     | ENSG00000141582 | HITS-CLIP |
| BCL9L    | ENSG00000186174 | Multiple  |
| STX3     | ENSG00000166900 | HITS-CLIP |
| KLF12    | ENSG00000118922 | Multiple  |
| MRPS12   | ENSG00000128626 | PAR-CLIP  |
| EPB41L4B | ENSG00000095203 | HITS-CLIP |
| CAMSAP2  | ENSG00000118200 | Multiple  |

---

---

|           |                 |           |
|-----------|-----------------|-----------|
| DIP2B     | ENSG00000066084 | Multiple  |
| ANKRD50   | ENSG00000151458 | Multiple  |
| LCOR      | ENSG00000196233 | Multiple  |
| ACLY      | ENSG00000131473 | HITS-CLIP |
| ZC3H6     | ENSG00000188177 | PAR-CLIP  |
| KIAA0319L | ENSG00000142687 | Multiple  |
| FZD6      | ENSG00000164930 | Multiple  |
| ZNF24     | ENSG00000172466 | PAR-CLIP  |
| PPP3R1    | ENSG00000221823 | HITS-CLIP |
| HIST1H4C  | ENSG00000197061 | PAR-CLIP  |
| TOB1      | ENSG00000141232 | HITS-CLIP |
| UBE2E2    | ENSG00000182247 | PAR-CLIP  |
| WAC       | ENSG00000095787 | PAR-CLIP  |
| GAN       | ENSG00000261609 | Multiple  |
| WNK1      | ENSG00000060237 | Multiple  |
| GSE1      | ENSG00000131149 | HITS-CLIP |
| PMF1      | ENSG00000160783 | PAR-CLIP  |
| PHF20     | ENSG00000025293 | PAR-CLIP  |
| B4GALT6   | ENSG00000118276 | PAR-CLIP  |
| SEMA3C    | ENSG00000075223 | Multiple  |
| CA12      | ENSG00000074410 | HITS-CLIP |
| PREPL     | ENSG00000138078 | HITS-CLIP |
| ADO       | ENSG00000181915 | Multiple  |
| SOD1      | ENSG00000142168 | PAR-CLIP  |
| TMEM64    | ENSG00000180694 | HITS-CLIP |
| EYA4      | ENSG00000112319 | PAR-CLIP  |
| SLC4A4    | ENSG00000080493 | PAR-CLIP  |
| CCT5      | ENSG00000150753 | Multiple  |
| ZNF664    | ENSG00000179195 | Multiple  |
| ATG4D     | ENSG00000130734 | PAR-CLIP  |
| IER2      | ENSG00000160888 | Multiple  |
| ERLIN2    | ENSG00000147475 | HITS-CLIP |
| ZSCAN22   | ENSG00000182318 | PAR-CLIP  |
| URB2      | ENSG00000135763 | HITS-CLIP |
| ZNF507    | ENSG00000168813 | HITS-CLIP |
| CPSF6     | ENSG00000111605 | Multiple  |
| APPBP2    | ENSG00000062725 | PAR-CLIP  |
| SMC3      | ENSG00000108055 | HITS-CLIP |
| SLC1A1    | ENSG00000106688 | PAR-CLIP  |
| TMED5     | ENSG00000117500 | Multiple  |
| SPG11     | ENSG00000104133 | HITS-CLIP |
| DSTYK     | ENSG00000133059 | Multiple  |
| STYX      | ENSG00000198252 | HITS-CLIP |
| AP4E1     | ENSG00000081014 | HITS-CLIP |

---

---

|          |                 |           |
|----------|-----------------|-----------|
| MED13    | ENSG00000108510 | Multiple  |
| CCNF     | ENSG00000162063 | PAR-CLIP  |
| SNTB2    | ENSG00000168807 | HITS-CLIP |
| ADNP2    | ENSG00000101544 | HITS-CLIP |
| TMTC3    | ENSG00000139324 | Multiple  |
| PAPPA    | ENSG00000182752 | HITS-CLIP |
| SQLE     | ENSG00000104549 | HITS-CLIP |
| RALBP1   | ENSG00000017797 | Multiple  |
| PTPN1    | ENSG00000196396 | HITS-CLIP |
| PPTC7    | ENSG00000196850 | Multiple  |
| NUP88    | ENSG00000108559 | HITS-CLIP |
| HIPK3    | ENSG00000110422 | HITS-CLIP |
| KIF13A   | ENSG00000137177 | Multiple  |
| DCBLD2   | ENSG00000057019 | Multiple  |
| PAPOLA   | ENSG00000090060 | PAR-CLIP  |
| DLG5     | ENSG00000151208 | HITS-CLIP |
| FZR1     | ENSG00000105325 | HITS-CLIP |
| AFF4     | ENSG00000072364 | HITS-CLIP |
| ANKRD17  | ENSG00000132466 | Multiple  |
| STAG2    | ENSG00000101972 | Multiple  |
| TIMM8A   | ENSG00000126953 | PAR-CLIP  |
| HNRNPA0  | ENSG00000177733 | Multiple  |
| N4BP2L2  | ENSG00000244754 | Multiple  |
| CSDE1    | ENSG00000009307 | HITS-CLIP |
| IRF2BP2  | ENSG00000168264 | HITS-CLIP |
| DGCR2    | ENSG00000070413 | HITS-CLIP |
| RBM22    | ENSG00000086589 | PAR-CLIP  |
| LMNB1    | ENSG00000113368 | Multiple  |
| MEF2D    | ENSG00000116604 | Multiple  |
| HMGB2    | ENSG00000164104 | Multiple  |
| TNKS2    | ENSG00000107854 | Multiple  |
| SP3      | ENSG00000172845 | HITS-CLIP |
| MOB1B    | ENSG00000173542 | PAR-CLIP  |
| ATP1B1   | ENSG00000143153 | Multiple  |
| URI1     | ENSG00000105176 | Multiple  |
| SERINC3  | ENSG00000132824 | HITS-CLIP |
| GPATCH2L | ENSG00000089916 | HITS-CLIP |
| C19orf12 | ENSG00000131943 | PAR-CLIP  |
| PPP2R5D  | ENSG00000112640 | HITS-CLIP |
| ARID4A   | ENSG00000032219 | HITS-CLIP |
| ZNF292   | ENSG00000188994 | PAR-CLIP  |
| WEE1     | ENSG00000166483 | Multiple  |
| CDK1     | ENSG00000170312 | PAR-CLIP  |
| SFT2D2   | ENSG00000213064 | HITS-CLIP |

---

---

|          |                 |           |
|----------|-----------------|-----------|
| LRP12    | ENSG00000147650 | PAR-CLIP  |
| PHF3     | ENSG00000118482 | Multiple  |
| AGFG1    | ENSG00000173744 | Multiple  |
| IGIP     | ENSG00000182700 | Multiple  |
| IGF1R    | ENSG00000140443 | PAR-CLIP  |
| LSM14A   | ENSG00000257103 | PAR-CLIP  |
| PIK3C2B  | ENSG00000133056 | HITS-CLIP |
| FMR1     | ENSG00000102081 | Multiple  |
| BTBD3    | ENSG00000132640 | Multiple  |
| PSME4    | ENSG00000068878 | HITS-CLIP |
| KPNA2    | ENSG00000182481 | PAR-CLIP  |
| AGO4     | ENSG00000134698 | PAR-CLIP  |
| EVI5     | ENSG00000067208 | Multiple  |
| HSPD1    | ENSG00000144381 | HITS-CLIP |
| ARF1     | ENSG00000143761 | Multiple  |
| FAM174A  | ENSG00000174132 | HITS-CLIP |
| NACC1    | ENSG00000160877 | Multiple  |
| CLTC     | ENSG00000141367 | Multiple  |
| KPNA4    | ENSG00000186432 | HITS-CLIP |
| DNAJC7   | ENSG00000168259 | Multiple  |
| IFITM3   | ENSG00000142089 | HITS-CLIP |
| SQSTM1   | ENSG00000161011 | PAR-CLIP  |
| TSPAN12  | ENSG00000106025 | Multiple  |
| ZNF800   | ENSG00000048405 | HITS-CLIP |
| ID4      | ENSG00000172201 | PAR-CLIP  |
| VCL      | ENSG00000035403 | PAR-CLIP  |
| USP47    | ENSG00000170242 | HITS-CLIP |
| GNB1     | ENSG00000078369 | Multiple  |
| SNN      | ENSG00000184602 | Multiple  |
| LUC7L3   | ENSG00000108848 | HITS-CLIP |
| NHLRC2   | ENSG00000196865 | Multiple  |
| ETF1     | ENSG00000120705 | HITS-CLIP |
| RHOA     | ENSG00000067560 | Multiple  |
| B3GALNT2 | ENSG00000162885 | Multiple  |
| PCDH10   | ENSG00000138650 | HITS-CLIP |
| MAP3K13  | ENSG00000073803 | HITS-CLIP |
| CHD7     | ENSG00000171316 | PAR-CLIP  |
| TJP1     | ENSG00000104067 | Multiple  |
| FAM91A1  | ENSG00000176853 | Multiple  |
| EED      | ENSG00000074266 | HITS-CLIP |
| CD2AP    | ENSG00000198087 | HITS-CLIP |
| RAB1A    | ENSG00000138069 | Multiple  |
| NARS     | ENSG00000134440 | PAR-CLIP  |
| PSAP     | ENSG00000197746 | HITS-CLIP |

---

---

|          |                 |           |
|----------|-----------------|-----------|
| TMEM179B | ENSG00000185475 | PAR-CLIP  |
| HNRNPU   | ENSG00000153187 | Multiple  |
| TCF19    | ENSG00000137310 | PAR-CLIP  |
| HSDL1    | ENSG00000103160 | Multiple  |
| MGARP    | ENSG00000137463 | PAR-CLIP  |
| ZKSCAN8  | ENSG00000198315 | PAR-CLIP  |
| EZH2     | ENSG00000106462 | Multiple  |
| CDK6     | ENSG00000105810 | PAR-CLIP  |
| HEG1     | ENSG00000173706 | Multiple  |
| MAP3K9   | ENSG00000006432 | PAR-CLIP  |
| NISCH    | ENSG00000010322 | HITS-CLIP |
| FYN      | ENSG00000010810 | PAR-CLIP  |
| 7-Sep    | ENSG00000122545 | PAR-CLIP  |
| SERINC1  | ENSG00000111897 | HITS-CLIP |
| NDFIP1   | ENSG00000131507 | PAR-CLIP  |
| CALM2    | ENSG00000143933 | PAR-CLIP  |
| PRKCE    | ENSG00000171132 | HITS-CLIP |
| SMARCD1  | ENSG00000066117 | Multiple  |
| MBD1     | ENSG00000141644 | PAR-CLIP  |
| BUB3     | ENSG00000154473 | PAR-CLIP  |
| GCC1     | ENSG00000179562 | PAR-CLIP  |
| MSN      | ENSG00000147065 | PAR-CLIP  |
| ZCCHC2   | ENSG00000141664 | PAR-CLIP  |
| RPS20    | ENSG00000008988 | Multiple  |
| EPC1     | ENSG00000120616 | HITS-CLIP |
| CDK2AP1  | ENSG00000111328 | PAR-CLIP  |
| TANK     | ENSG00000136560 | Multiple  |
| VHL      | ENSG00000134086 | HITS-CLIP |
| PTPN22   | ENSG00000134242 | HITS-CLIP |
| MAT2B    | ENSG00000038274 | HITS-CLIP |
| 7-Mar    | ENSG00000136536 | PAR-CLIP  |
| LBR      | ENSG00000143815 | Multiple  |
| DST      | ENSG00000151914 | Multiple  |
| KIAA2026 | ENSG00000183354 | PAR-CLIP  |
| AMMECR1L | ENSG00000144233 | PAR-CLIP  |
| TMEM65   | ENSG00000164983 | Multiple  |
| NKX6-1   | ENSG00000163623 | PAR-CLIP  |
| FOXK2    | ENSG00000141568 | HITS-CLIP |
| ZNF746   | ENSG00000181220 | Multiple  |
| SIKE1    | ENSG00000052723 | Multiple  |
| ADIPOR2  | ENSG00000006831 | Multiple  |
| IER3     | ENSG00000137331 | HITS-CLIP |
| RFX7     | ENSG00000181827 | Multiple  |
| FAT4     | ENSG00000196159 | Multiple  |

---



---

|          |                 |           |
|----------|-----------------|-----------|
| ATP2B1   | ENSG00000070961 | PAR-CLIP  |
| ANLN     | ENSG00000011426 | Multiple  |
| FAM96A   | ENSG00000166797 | Multiple  |
| NSD1     | ENSG00000165671 | Multiple  |
| RCN2     | ENSG00000117906 | HITS-CLIP |
| PLEKHA8  | ENSG00000106086 | Multiple  |
| NCL      | ENSG00000115053 | HITS-CLIP |
| ATP5B    | ENSG00000110955 | Multiple  |
| FAM222B  | ENSG00000173065 | Multiple  |
| CHEK1    | ENSG00000149554 | Multiple  |
| C7orf49  | ENSG00000122783 | HITS-CLIP |
| KLF10    | ENSG00000155090 | HITS-CLIP |
| MPP5     | ENSG00000072415 | Multiple  |
| MRFAP1   | ENSG00000179010 | HITS-CLIP |
| TMEM181  | ENSG00000146433 | Multiple  |
| PPP2R5A  | ENSG00000066027 | PAR-CLIP  |
| MAML3    | ENSG00000196782 | PAR-CLIP  |
| TNRC6B   | ENSG00000100354 | Multiple  |
| PDE4D    | ENSG00000113448 | HITS-CLIP |
| PRRC2C   | ENSG00000117523 | HITS-CLIP |
| ZNF197   | ENSG00000186448 | PAR-CLIP  |
| MCTS1    | ENSG00000232119 | HITS-CLIP |
| DCAF13   | ENSG00000164934 | HITS-CLIP |
| ASH1L    | ENSG00000116539 | PAR-CLIP  |
| TOP2B    | ENSG00000077097 | HITS-CLIP |
| ZSWIM6   | ENSG00000130449 | PAR-CLIP  |
| IMPA1    | ENSG00000133731 | Multiple  |
| PANK3    | ENSG00000120137 | Multiple  |
| MTMR7    | ENSG00000003987 | HITS-CLIP |
| EDEM1    | ENSG00000134109 | HITS-CLIP |
| SRSF1    | ENSG00000136450 | HITS-CLIP |
| PURB     | ENSG00000146676 | Multiple  |
| MRPL35   | ENSG00000132313 | PAR-CLIP  |
| EVL      | ENSG00000196405 | HITS-CLIP |
| HIF1AN   | ENSG00000166135 | HITS-CLIP |
| SENP6    | ENSG00000112701 | HITS-CLIP |
| NMI      | ENSG00000123609 | PAR-CLIP  |
| OSBPL9   | ENSG00000117859 | PAR-CLIP  |
| ZFP82    | ENSG00000181007 | PAR-CLIP  |
| SLC35F5  | ENSG00000115084 | PAR-CLIP  |
| TMEM170B | ENSG00000205269 | HITS-CLIP |
| ZNF207   | ENSG00000010244 | Multiple  |
| RFC1     | ENSG00000035928 | HITS-CLIP |
| TRIP12   | ENSG00000153827 | HITS-CLIP |

---

---

|           |                 |           |
|-----------|-----------------|-----------|
| C19orf82  | ENSG00000267106 | HITS-CLIP |
| DYRK2     | ENSG00000127334 | Multiple  |
| TXNDC16   | ENSG00000087301 | HITS-CLIP |
| H2AFV     | ENSG00000105968 | Multiple  |
| DCAF7     | ENSG00000136485 | Multiple  |
| CDK8      | ENSG00000132964 | Multiple  |
| RIOK2     | ENSG00000058729 | PAR-CLIP  |
| ARL4C     | ENSG00000188042 | Multiple  |
| C7orf73   | ENSG00000243317 | PAR-CLIP  |
| HECTD1    | ENSG00000092148 | Multiple  |
| ASAP1     | ENSG00000153317 | PAR-CLIP  |
| MAPK1IP1L | ENSG00000168175 | HITS-CLIP |
| GREB1L    | ENSG00000141449 | Multiple  |
| ACVR2B    | ENSG00000114739 | PAR-CLIP  |
| EDEM3     | ENSG00000116406 | Multiple  |
| FAM46A    | ENSG00000112773 | Multiple  |
| CD81      | ENSG00000110651 | Multiple  |
| RAB5A     | ENSG00000144566 | HITS-CLIP |
| FAM69B    | ENSG00000165716 | HITS-CLIP |
| PCGF5     | ENSG00000180628 | PAR-CLIP  |
| SCAMP1    | ENSG00000085365 | Multiple  |
| EIF5      | ENSG00000100664 | Multiple  |
| ARID2     | ENSG00000189079 | HITS-CLIP |
| PRICKLE1  | ENSG00000139174 | PAR-CLIP  |
| ATM       | ENSG00000149311 | PAR-CLIP  |
| XPO7      | ENSG00000130227 | PAR-CLIP  |
| SCAP      | ENSG00000114650 | HITS-CLIP |
| MAVS      | ENSG00000088888 | HITS-CLIP |
| HECTD2    | ENSG00000165338 | PAR-CLIP  |
| EIF2S3    | ENSG00000130741 | PAR-CLIP  |
| ISOC1     | ENSG00000066583 | HITS-CLIP |
| ETNK1     | ENSG00000139163 | Multiple  |
| MLEC      | ENSG00000110917 | Multiple  |
| ARHGAP18  | ENSG00000146376 | HITS-CLIP |
| PISD      | ENSG00000241878 | PAR-CLIP  |
| ZNF143    | ENSG00000166478 | PAR-CLIP  |
| ZNF217    | ENSG00000171940 | Multiple  |
| LARP4B    | ENSG00000107929 | Multiple  |
| ABHD10    | ENSG00000144827 | PAR-CLIP  |
| ANK3      | ENSG00000151150 | HITS-CLIP |
| RASA1     | ENSG00000145715 | HITS-CLIP |
| SH3BP4    | ENSG00000130147 | HITS-CLIP |
| FH        | ENSG00000091483 | HITS-CLIP |
| ARHGEF11  | ENSG00000132694 | HITS-CLIP |

---

---

|          |                 |              |
|----------|-----------------|--------------|
| SNX31    | ENSG00000174226 | PAR-CLIP     |
| DERL2    | ENSG00000072849 | PAR-CLIP     |
| KANSL1   | ENSG00000120071 | HITS-CLIP    |
| CERS2    | ENSG00000143418 | PAR-CLIP     |
| SLC9A1   | ENSG00000090020 | HITS-CLIP    |
| REPIN1   | ENSG00000214022 | HITS-CLIP    |
| KIAA1432 | ENSG00000107036 | Multiple     |
| SMC4     | ENSG00000113810 | HITS-CLIP    |
| HDGF     | ENSG00000143321 | HITS-CLIP    |
| ZFX      | ENSG00000005889 | Multiple     |
| DDIT4    | ENSG00000168209 | Multiple     |
| SFXN1    | ENSG00000164466 | PAR-CLIP     |
| TFAP4    | ENSG00000090447 | Multiple     |
| PIKFYVE  | ENSG00000115020 | HITS-CLIP    |
| AEBP2    | ENSG00000139154 | Multiple     |
| TET3     | ENSG00000187605 | Multiple     |
| CMIP     | ENSG00000153815 | HITS-CLIP    |
| ZNF655   | ENSG00000197343 | Multiple     |
| CSNK1D   | ENSG00000141551 | Multiple     |
| ATP5G3   | ENSG00000154518 | Multiple     |
| AGO1     | ENSG00000092847 | PAR-CLIP     |
| AP1S2    | ENSG00000182287 | Multiple     |
| PCNX     | ENSG00000100731 | HITS-CLIP    |
| HNRNPAB  | ENSG00000197451 | Multiple     |
| CLIP1    | ENSG00000130779 | Multiple     |
| EEF2     | ENSG00000167658 | PAR-CLIP     |
| TMEM161B | ENSG00000164180 | HITS-CLIP    |
| BTG2     | ENSG00000159388 | Multiple     |
| CASP3    | ENSG00000164305 | Western Blot |
| FBN1     | ENSG00000166147 | Multiple     |
| STX16    | ENSG00000124222 | PAR-CLIP     |
| PDCD10   | ENSG00000114209 | HITS-CLIP    |
| PAQR7    | ENSG00000182749 | PAR-CLIP     |
| AK6      | ENSG00000273841 | HITS-CLIP    |
| JUN      | ENSG00000177606 | PAR-CLIP     |
| PPP1R15B | ENSG00000158615 | HITS-CLIP    |
| WDR33    | ENSG00000136709 | PAR-CLIP     |
| DCP2     | ENSG00000172795 | Multiple     |
| ATP6AP2  | ENSG00000182220 | Multiple     |
| ZNF649   | ENSG00000198093 | PAR-CLIP     |
| FANCM    | ENSG00000187790 | HITS-CLIP    |
| GOLGA8A  | ENSG00000175265 | Multiple     |
| HMGXB4   | ENSG00000100281 | PAR-CLIP     |
| SLC20A2  | ENSG00000168575 | PAR-CLIP     |

---

---

|          |                 |           |
|----------|-----------------|-----------|
| CCND1    | ENSG00000110092 | Multiple  |
| GRPEL2   | ENSG00000164284 | Multiple  |
| PFN2     | ENSG00000070087 | PAR-CLIP  |
| FAM117B  | ENSG00000138439 | PAR-CLIP  |
| C10orf12 | ENSG00000155640 | Multiple  |
| UBE2A    | ENSG00000077721 | Multiple  |
| ZNF678   | ENSG00000181450 | PAR-CLIP  |
| PUM1     | ENSG00000134644 | HITS-CLIP |
| PPP3CB   | ENSG00000107758 | HITS-CLIP |
| TBC1D24  | ENSG00000162065 | PAR-CLIP  |
| SNX27    | ENSG00000143376 | PAR-CLIP  |
| PTBP3    | ENSG00000119314 | HITS-CLIP |
| TUBA1C   | ENSG00000167553 | PAR-CLIP  |
| GPD2     | ENSG00000115159 | PAR-CLIP  |
| NR3C1    | ENSG00000113580 | PAR-CLIP  |
| TAPBP    | ENSG00000231925 | HITS-CLIP |
| SSFA2    | ENSG00000138434 | Multiple  |
| PIGC     | ENSG00000135845 | HITS-CLIP |
| KCTD2    | ENSG00000180901 | PAR-CLIP  |
| PUS7L    | ENSG00000129317 | HITS-CLIP |
| IFFO2    | ENSG00000169991 | HITS-CLIP |
| SKP2     | ENSG00000145604 | Multiple  |
| ZNF264   | ENSG00000083844 | PAR-CLIP  |
| CIAPIN1  | ENSG00000005194 | HITS-CLIP |
| PGBD4    | ENSG00000182405 | PAR-CLIP  |
| GCN1L1   | ENSG00000089154 | HITS-CLIP |
| FAR1     | ENSG00000197601 | PAR-CLIP  |
| TMEM19   | ENSG00000139291 | Multiple  |
| NEK4     | ENSG00000114904 | HITS-CLIP |
| TMEM87A  | ENSG00000103978 | HITS-CLIP |
| BLOC1S6  | ENSG00000104164 | Multiple  |
| SLC19A2  | ENSG00000117479 | Multiple  |
| EAPP     | ENSG00000129518 | PAR-CLIP  |
| LRRC58   | ENSG00000163428 | PAR-CLIP  |
| FAM8A1   | ENSG00000137414 | Multiple  |
| HELZ     | ENSG00000198265 | Multiple  |
| MCC      | ENSG00000171444 | PAR-CLIP  |
| RGMB     | ENSG00000174136 | PAR-CLIP  |
| SACS     | ENSG00000151835 | Multiple  |
| C8orf4   | ENSG00000176907 | HITS-CLIP |
| ATP5A1   | ENSG00000152234 | HITS-CLIP |
| ITM2C    | ENSG00000135916 | HITS-CLIP |
| PPAP2B   | ENSG00000162407 | HITS-CLIP |
| CSNK1A1  | ENSG00000113712 | Multiple  |

---

---

|          |                 |           |
|----------|-----------------|-----------|
| CGGBP1   | ENSG00000163320 | Multiple  |
| LNPEP    | ENSG00000113441 | HITS-CLIP |
| CEBPA    | ENSG00000245848 | PAR-CLIP  |
| SMU1     | ENSG00000122692 | HITS-CLIP |
| UBE3C    | ENSG00000009335 | PAR-CLIP  |
| PARVA    | ENSG00000197702 | HITS-CLIP |
| CD46     | ENSG00000117335 | PAR-CLIP  |
| RAPGEF6  | ENSG00000158987 | PAR-CLIP  |
| MANF     | ENSG00000145050 | PAR-CLIP  |
| SMIM15   | ENSG00000188725 | HITS-CLIP |
| SACM1L   | ENSG00000211456 | Multiple  |
| PPM1A    | ENSG00000100614 | PAR-CLIP  |
| MYO9A    | ENSG00000066933 | HITS-CLIP |
| CDC14B   | ENSG00000081377 | HITS-CLIP |
| VCAN     | ENSG00000038427 | HITS-CLIP |
| USP46    | ENSG00000109189 | PAR-CLIP  |
| WSB1     | ENSG00000109046 | HITS-CLIP |
| WDR36    | ENSG00000134987 | PAR-CLIP  |
| GPRC5A   | ENSG00000013588 | PAR-CLIP  |
| LIFR     | ENSG00000113594 | Multiple  |
| SUB1     | ENSG00000113387 | Multiple  |
| DIAPH1   | ENSG00000131504 | Multiple  |
| IGF2     | ENSG00000167244 | HITS-CLIP |
| C21orf91 | ENSG00000154642 | Multiple  |
| ZDHHC4   | ENSG00000136247 | HITS-CLIP |
| GOLGA4   | ENSG00000144674 | HITS-CLIP |
| KLF3     | ENSG00000109787 | Multiple  |
| ATXN1    | ENSG00000124788 | PAR-CLIP  |
| ARID1A   | ENSG00000117713 | Multiple  |
| DEGS1    | ENSG00000143753 | PAR-CLIP  |
| CLDND1   | ENSG00000080822 | Multiple  |
| DENND5B  | ENSG00000170456 | HITS-CLIP |
| ZNF778   | ENSG00000170100 | PAR-CLIP  |
| IGF2R    | ENSG00000197081 | Multiple  |
| MYPOP    | ENSG00000176182 | HITS-CLIP |
| ANKRD42  | ENSG00000137494 | Multiple  |
| SLC16A1  | ENSG00000155380 | Multiple  |
| EIF4A2   | ENSG00000156976 | HITS-CLIP |
| MTPN     | ENSG00000105887 | HITS-CLIP |
| SKIL     | ENSG00000136603 | Multiple  |
| BIRC6    | ENSG00000115760 | HITS-CLIP |
| PCNXL2   | ENSG00000135749 | PAR-CLIP  |
| DLG3     | ENSG00000082458 | HITS-CLIP |
| BMP2K    | ENSG00000138756 | PAR-CLIP  |

---

---

|          |                 |           |
|----------|-----------------|-----------|
| JRKL     | ENSG00000183340 | HITS-CLIP |
| REL      | ENSG00000162924 | Multiple  |
| CEP350   | ENSG00000135837 | Multiple  |
| FRMD6    | ENSG00000139926 | Multiple  |
| HAUS6    | ENSG00000147874 | HITS-CLIP |
| MBD2     | ENSG00000134046 | PAR-CLIP  |
| ARNTL2   | ENSG00000029153 | PAR-CLIP  |
| ATRX     | ENSG00000085224 | HITS-CLIP |
| ZFP41    | ENSG00000264668 | PAR-CLIP  |
| SPRTN    | ENSG00000010072 | PAR-CLIP  |
| MAFK     | ENSG00000198517 | PAR-CLIP  |
| ZNF687   | ENSG00000143373 | HITS-CLIP |
| ZMYM2    | ENSG00000121741 | Multiple  |
| APLP2    | ENSG00000084234 | Multiple  |
| ENPP2    | ENSG00000136960 | Multiple  |
| CD86     | ENSG00000114013 | PAR-CLIP  |
| GDE1     | ENSG00000006007 | PAR-CLIP  |
| GMPS     | ENSG00000163655 | PAR-CLIP  |
| HSP90AB1 | ENSG00000096384 | HITS-CLIP |
| ZBTB5    | ENSG00000168795 | PAR-CLIP  |
| MYO5A    | ENSG00000197535 | Multiple  |
| SLC38A2  | ENSG00000134294 | Multiple  |
| RNF19A   | ENSG00000034677 | Multiple  |
| ZNF100   | ENSG00000197020 | Multiple  |
| PPP4R1   | ENSG00000154845 | Multiple  |
| NSA2     | ENSG00000164346 | HITS-CLIP |
| KDM3B    | ENSG00000120733 | PAR-CLIP  |
| JMJD1C   | ENSG00000171988 | HITS-CLIP |
| TIMP3    | ENSG00000100234 | HITS-CLIP |
| STAU2    | ENSG00000040341 | PAR-CLIP  |
| H2AFZ    | ENSG00000164032 | HITS-CLIP |
| GNG2     | ENSG00000186469 | HITS-CLIP |
| ATP11A   | ENSG00000068650 | PAR-CLIP  |
| HIATL1   | ENSG00000148110 | PAR-CLIP  |
| CREBZF   | ENSG00000137504 | PAR-CLIP  |
| SFPQ     | ENSG00000116560 | Multiple  |
| DAG1     | ENSG00000173402 | Multiple  |
| RPRD1B   | ENSG00000101413 | HITS-CLIP |
| CFL2     | ENSG00000165410 | PAR-CLIP  |
| SEC24A   | ENSG00000113615 | Multiple  |
| TEAD1    | ENSG00000187079 | Multiple  |
| SCYL2    | ENSG00000136021 | HITS-CLIP |
| BAZ2A    | ENSG00000076108 | Multiple  |
| STRN3    | ENSG00000196792 | PAR-CLIP  |

---

---

|          |                 |           |
|----------|-----------------|-----------|
| TGIF1    | ENSG00000177426 | HITS-CLIP |
| MOB4     | ENSG00000115540 | Multiple  |
| STARD3NL | ENSG00000010270 | PAR-CLIP  |
| FKBP8    | ENSG00000105701 | HITS-CLIP |
| MARCKSL1 | ENSG00000175130 | Multiple  |
| POMT1    | ENSG00000130714 | HITS-CLIP |
| CPEB2    | ENSG00000137449 | Multiple  |
| RORA     | ENSG00000069667 | Multiple  |
| SLC22A23 | ENSG00000137266 | HITS-CLIP |
| CDC42SE2 | ENSG00000158985 | Multiple  |
| ZFAND6   | ENSG00000086666 | HITS-CLIP |
| C6ORF174 | ENSG00000255330 | PAR-CLIP  |
| GLCC1    | ENSG00000106415 | HITS-CLIP |
| HDAC2    | ENSG00000196591 | PAR-CLIP  |
| NRP1     | ENSG00000099250 | Multiple  |
| NAA30    | ENSG00000139977 | HITS-CLIP |
| RFX3     | ENSG00000080298 | HITS-CLIP |
| MBD6     | ENSG00000166987 | HITS-CLIP |
| TST      | ENSG00000128311 | PAR-CLIP  |
| ARL5A    | ENSG00000162980 | HITS-CLIP |
| PSMB2    | ENSG00000126067 | HITS-CLIP |
| DHTKD1   | ENSG00000181192 | Multiple  |
| RAP2C    | ENSG00000123728 | Multiple  |
| TMPO     | ENSG00000120802 | PAR-CLIP  |
| PRIM1    | ENSG00000198056 | HITS-CLIP |
| DCUN1D3  | ENSG00000188215 | HITS-CLIP |
| JAZF1    | ENSG00000153814 | HITS-CLIP |
| GNPNAT1  | ENSG00000100522 | HITS-CLIP |
| ASCC3    | ENSG00000112249 | HITS-CLIP |
| LARP4    | ENSG00000161813 | HITS-CLIP |
| CUX1     | ENSG00000257923 | HITS-CLIP |
| PTPRJ    | ENSG00000149177 | HITS-CLIP |
| TNFRSF21 | ENSG00000146072 | PAR-CLIP  |
| ZBTB43   | ENSG00000169155 | Multiple  |
| MNX1     | ENSG00000130675 | Multiple  |
| RNASE4   | ENSG00000258818 | PAR-CLIP  |
| RAC1     | ENSG00000136238 | PAR-CLIP  |
| CHRAC1   | ENSG00000104472 | PAR-CLIP  |
| C6orf62  | ENSG00000112308 | HITS-CLIP |
| OTUD4    | ENSG00000164164 | Multiple  |
| STC2     | ENSG00000113739 | HITS-CLIP |
| MAK16    | ENSG00000198042 | PAR-CLIP  |
| PEBP1    | ENSG00000089220 | HITS-CLIP |
| MESDC2   | ENSG00000117899 | HITS-CLIP |

---

---

|          |                 |           |
|----------|-----------------|-----------|
| FGF2     | ENSG00000138685 | PAR-CLIP  |
| ATP6V1A  | ENSG00000114573 | Multiple  |
| RNF219   | ENSG00000152193 | Multiple  |
| THAP2    | ENSG00000173451 | PAR-CLIP  |
| KDM6B    | ENSG00000132510 | Multiple  |
| MCUR1    | ENSG00000050393 | HITS-CLIP |
| ZFP64    | ENSG00000020256 | Multiple  |
| HOXC13   | ENSG00000123364 | HITS-CLIP |
| SESN2    | ENSG00000130766 | Multiple  |
| SDE2     | ENSG00000143751 | HITS-CLIP |
| HSPA4L   | ENSG00000164070 | Multiple  |
| EBAG9    | ENSG00000147654 | HITS-CLIP |
| PSMD1    | ENSG00000173692 | HITS-CLIP |
| SURF4    | ENSG00000148248 | HITS-CLIP |
| C16orf72 | ENSG00000182831 | Multiple  |
| MRGBP    | ENSG00000101189 | Multiple  |
| PYGO2    | ENSG00000163348 | Multiple  |
| SSX2IP   | ENSG00000117155 | PAR-CLIP  |
| ZBTB21   | ENSG00000173276 | Multiple  |
| DHX15    | ENSG00000109606 | PAR-CLIP  |
| EMP2     | ENSG00000213853 | HITS-CLIP |
| DYNLL2   | ENSG00000264364 | HITS-CLIP |
| ZC3H11A  | ENSG00000058673 | PAR-CLIP  |
| ADNP     | ENSG00000101126 | Multiple  |
| MAD2L1   | ENSG00000164109 | Multiple  |
| PSEN1    | ENSG00000080815 | Multiple  |
| CCNY     | ENSG00000108100 | Multiple  |
| ZNF430   | ENSG00000118620 | PAR-CLIP  |
| TPI1     | ENSG00000111669 | Multiple  |
| EIF2S1   | ENSG00000134001 | PAR-CLIP  |
| RRM1     | ENSG00000167325 | HITS-CLIP |
| RANBP2   | ENSG00000153201 | HITS-CLIP |
| MGRN1    | ENSG00000102858 | HITS-CLIP |
| POLR3K   | ENSG00000161980 | PAR-CLIP  |
| SP1      | ENSG00000185591 | PAR-CLIP  |
| RARS     | ENSG00000113643 | PAR-CLIP  |
| OVGP1    | ENSG00000085465 | PAR-CLIP  |
| FAM98A   | ENSG00000119812 | HITS-CLIP |
| PSMB1    | ENSG00000008018 | PAR-CLIP  |
| ACTN4    | ENSG00000130402 | Multiple  |
| KRT80    | ENSG00000167767 | Multiple  |
| FNIP1    | ENSG00000217128 | HITS-CLIP |
| SLC39A6  | ENSG00000141424 | HITS-CLIP |
| FUT11    | ENSG00000196968 | PAR-CLIP  |

---



---

|          |                 |           |
|----------|-----------------|-----------|
| SMIM13   | ENSG00000224531 | Multiple  |
| KLC1     | ENSG00000126214 | PAR-CLIP  |
| NPTN     | ENSG00000156642 | HITS-CLIP |
| PTPLAD1  | ENSG00000074696 | PAR-CLIP  |
| ZNF451   | ENSG00000112200 | Multiple  |
| GNPTAB   | ENSG00000111670 | Multiple  |
| TSPYL4   | ENSG00000187189 | PAR-CLIP  |
| NFE2L2   | ENSG00000116044 | Multiple  |
| EPC2     | ENSG00000135999 | PAR-CLIP  |
| FAS      | ENSG00000026103 | Multiple  |
| ARID4B   | ENSG00000054267 | HITS-CLIP |
| PRICKLE2 | ENSG00000163637 | HITS-CLIP |
| FOXF1    | ENSG00000103241 | Multiple  |
| RPS6KA3  | ENSG00000177189 | HITS-CLIP |
| MKI67    | ENSG00000148773 | PAR-CLIP  |
| SCOC     | ENSG00000153130 | HITS-CLIP |
| FXR2     | ENSG00000129245 | PAR-CLIP  |
| TGFBR3   | ENSG00000069702 | Multiple  |
| UBE2F    | ENSG00000184182 | PAR-CLIP  |
| SUMO3    | ENSG00000184900 | HITS-CLIP |
| TLK1     | ENSG00000198586 | HITS-CLIP |
| CD200R1  | ENSG00000163606 | PAR-CLIP  |
| EP300    | ENSG00000100393 | HITS-CLIP |
| POM121   | ENSG00000196313 | HITS-CLIP |
| PRDM2    | ENSG00000116731 | PAR-CLIP  |
| ZNF714   | ENSG00000160352 | Multiple  |
| DDAH1    | ENSG00000153904 | HITS-CLIP |
| GAB1     | ENSG00000109458 | HITS-CLIP |
| PGRMC2   | ENSG00000164040 | PAR-CLIP  |
| MPRIP    | ENSG00000133030 | HITS-CLIP |
| ACP2     | ENSG00000134575 | HITS-CLIP |
| TFB2M    | ENSG00000162851 | Multiple  |
| SLC44A1  | ENSG00000070214 | PAR-CLIP  |
| DCUN1D1  | ENSG00000043093 | Multiple  |
| CHSY1    | ENSG00000131873 | PAR-CLIP  |
| GPCPD1   | ENSG00000125772 | HITS-CLIP |
| CEBPD    | ENSG00000221869 | HITS-CLIP |
| FAM73A   | ENSG00000180488 | Multiple  |
| RASSF9   | ENSG00000198774 | Multiple  |
| CDK17    | ENSG00000059758 | Multiple  |
| ZBTB7A   | ENSG00000178951 | PAR-CLIP  |
| PLAG1    | ENSG00000181690 | PAR-CLIP  |
| PUM2     | ENSG00000055917 | HITS-CLIP |
| NFIB     | ENSG00000147862 | Multiple  |

---

---

|          |                 |           |
|----------|-----------------|-----------|
| REV3L    | ENSG00000009413 | Multiple  |
| AKT3     | ENSG00000117020 | PAR-CLIP  |
| CLDN4    | ENSG00000189143 | HITS-CLIP |
| GLTSCR1  | ENSG00000063169 | Multiple  |
| PITPNB   | ENSG00000180957 | Multiple  |
| STON2    | ENSG00000140022 | HITS-CLIP |
| ATF7IP   | ENSG00000171681 | Multiple  |
| HPRT1    | ENSG00000165704 | HITS-CLIP |
| OSGIN2   | ENSG00000164823 | HITS-CLIP |
| CHMP3    | ENSG00000115561 | HITS-CLIP |
| HNRNPH2  | ENSG00000126945 | HITS-CLIP |
| TSPYL1   | ENSG00000189241 | Multiple  |
| SCAF11   | ENSG00000139218 | HITS-CLIP |
| POLR1E   | ENSG00000137054 | PAR-CLIP  |
| MPHOSPH9 | ENSG00000051825 | PAR-CLIP  |
| UBXN1    | ENSG00000162191 | HITS-CLIP |
| STAMBP   | ENSG00000124356 | HITS-CLIP |
| UBE2D1   | ENSG00000072401 | Multiple  |
| G3BP2    | ENSG00000138757 | HITS-CLIP |
| RBBP7    | ENSG00000102054 | Multiple  |
| PABPN1   | ENSG00000100836 | PAR-CLIP  |
| PCDH7    | ENSG00000169851 | HITS-CLIP |
| MFF      | ENSG00000168958 | PAR-CLIP  |
| AHCY     | ENSG00000101444 | HITS-CLIP |
| ARCN1    | ENSG00000095139 | Multiple  |
| KPNA6    | ENSG00000025800 | HITS-CLIP |
| EIF3M    | ENSG00000149100 | HITS-CLIP |
| NCBP2    | ENSG00000114503 | Multiple  |
| LONRF2   | ENSG00000170500 | PAR-CLIP  |
| SPINT1   | ENSG00000166145 | HITS-CLIP |
| CYP1B1   | ENSG00000138061 | HITS-CLIP |
| ACSL4    | ENSG00000068366 | PAR-CLIP  |
| UBE2D2   | ENSG00000131508 | Multiple  |
| UBE2G1   | ENSG00000132388 | Multiple  |
| SDC2     | ENSG00000169439 | HITS-CLIP |
| TFIP11   | ENSG00000100109 | HITS-CLIP |
| PAPD7    | ENSG00000112941 | HITS-CLIP |
| RLIM     | ENSG00000131263 | HITS-CLIP |
| ZNF512B  | ENSG00000196700 | HITS-CLIP |
| C8orf76  | ENSG00000189376 | Multiple  |
| PLEKHA1  | ENSG00000107679 | Multiple  |
| ZNRF2    | ENSG00000180233 | PAR-CLIP  |
| ZNF585A  | ENSG00000196967 | PAR-CLIP  |
| METTL14  | ENSG00000145388 | Multiple  |

---

---

|          |                 |           |
|----------|-----------------|-----------|
| NDC1     | ENSG00000058804 | HITS-CLIP |
| SLC7A2   | ENSG00000003989 | Multiple  |
| TULP4    | ENSG00000130338 | PAR-CLIP  |
| FMN2     | ENSG00000155816 | Multiple  |
| MYCN     | ENSG00000134323 | Multiple  |
| 2-Sep    | ENSG00000168385 | Multiple  |
| DLX1     | ENSG00000144355 | PAR-CLIP  |
| C22orf39 | ENSG00000242259 | HITS-CLIP |
| GFRA1    | ENSG00000151892 | Multiple  |
| DIMT1    | ENSG00000086189 | Multiple  |
| PKN2     | ENSG00000065243 | HITS-CLIP |
| TMEM126B | ENSG00000171204 | HITS-CLIP |
| USP7     | ENSG00000187555 | HITS-CLIP |
| APOOL    | ENSG00000155008 | Multiple  |
| MATR3    | ENSG00000015479 | PAR-CLIP  |
| LRIF1    | ENSG00000121931 | Multiple  |
| TMEM30A  | ENSG00000112697 | HITS-CLIP |
| CDKN1A   | ENSG00000124762 | Multiple  |
| ERH      | ENSG00000100632 | HITS-CLIP |
| STMN1    | ENSG00000117632 | Multiple  |
| UHMK1    | ENSG00000152332 | Multiple  |
| WTAP     | ENSG00000146457 | Multiple  |
| BDP1     | ENSG00000145734 | HITS-CLIP |
| CCNJ     | ENSG00000107443 | PAR-CLIP  |
| C3orf38  | ENSG00000179021 | Multiple  |
| CLSPN    | ENSG00000092853 | PAR-CLIP  |
| HIAT1    | ENSG00000156875 | PAR-CLIP  |
| TNRC6A   | ENSG00000090905 | Multiple  |
| MAP3K2   | ENSG00000169967 | PAR-CLIP  |
| ARF6     | ENSG00000165527 | PAR-CLIP  |
| USP9X    | ENSG00000124486 | Multiple  |
| MBNL1    | ENSG00000152601 | Multiple  |
| PRC1     | ENSG00000198901 | PAR-CLIP  |
| ZFYVE21  | ENSG00000100711 | HITS-CLIP |
| HEXIM1   | ENSG00000186834 | PAR-CLIP  |
| TMEM201  | ENSG00000188807 | PAR-CLIP  |
| MON2     | ENSG00000061987 | HITS-CLIP |
| PDXDC1   | ENSG00000179889 | PAR-CLIP  |
| NDUFA2   | ENSG00000131495 | Multiple  |
| ZFHX4    | ENSG00000091656 | Multiple  |
| OXR1     | ENSG00000164830 | PAR-CLIP  |
| CNEP1R1  | ENSG00000205423 | PAR-CLIP  |
| TNFAIP1  | ENSG00000109079 | PAR-CLIP  |
| ZBTB18   | ENSG00000179456 | PAR-CLIP  |

---

---

|           |                 |           |
|-----------|-----------------|-----------|
| GFPT2     | ENSG00000131459 | HITS-CLIP |
| INA       | ENSG00000148798 | PAR-CLIP  |
| SUV39H2   | ENSG00000152455 | PAR-CLIP  |
| SLC39A10  | ENSG00000196950 | HITS-CLIP |
| CKAP2     | ENSG00000136108 | PAR-CLIP  |
| TGIF2     | ENSG00000118707 | PAR-CLIP  |
| PTX3      | ENSG00000163661 | HITS-CLIP |
| OTULIN    | ENSG00000154124 | HITS-CLIP |
| HNRNPA2B1 | ENSG00000122566 | Multiple  |
| DCAF12    | ENSG00000198876 | HITS-CLIP |
| RPRD1A    | ENSG00000141425 | Multiple  |
| MOB3C     | ENSG00000142961 | HITS-CLIP |
| ACYP1     | ENSG00000119640 | PAR-CLIP  |
| ZBTB1     | ENSG00000126804 | PAR-CLIP  |
| CCDC186   | ENSG00000165813 | HITS-CLIP |
| MORC3     | ENSG00000159256 | Multiple  |
| BCL11B    | ENSG00000127152 | PAR-CLIP  |
| GORASP2   | ENSG00000115806 | HITS-CLIP |
| AASDHPPT  | ENSG00000149313 | Multiple  |
| BCOR      | ENSG00000183337 | PAR-CLIP  |
| DDX1      | ENSG00000079785 | HITS-CLIP |
| SHANK2    | ENSG00000162105 | HITS-CLIP |
| ZFP41     | ENSG00000181638 | PAR-CLIP  |
| CCNI      | ENSG00000118816 | Multiple  |
| BTBD7     | ENSG00000011114 | Multiple  |
| PHF13     | ENSG00000116273 | Multiple  |
| CKS2      | ENSG00000123975 | HITS-CLIP |
| HIPK1     | ENSG00000163349 | Multiple  |
| HIST2H2BE | ENSG00000184678 | Multiple  |
| NRIP1     | ENSG00000180530 | HITS-CLIP |
| ZBTB34    | ENSG00000177125 | Multiple  |
| RGL1      | ENSG00000143344 | Multiple  |
| AP1G1     | ENSG00000166747 | Multiple  |
| SMAD7     | ENSG00000101665 | HITS-CLIP |
| RAB8B     | ENSG00000166128 | PAR-CLIP  |
| CAAP1     | ENSG00000120159 | PAR-CLIP  |
| POMP      | ENSG00000132963 | HITS-CLIP |
| DCLRE1B   | ENSG00000118655 | Multiple  |
| ZNF367    | ENSG00000165244 | Multiple  |
| TRIQK     | ENSG00000205133 | PAR-CLIP  |
| TSN       | ENSG00000211460 | Multiple  |
| ZFP36L2   | ENSG00000152518 | Multiple  |
| TMEM192   | ENSG00000170088 | PAR-CLIP  |
| NUPL2     | ENSG00000136243 | PAR-CLIP  |

---

---

|           |                 |           |
|-----------|-----------------|-----------|
| KHNYN     | ENSG00000100441 | PAR-CLIP  |
| ABCC5     | ENSG00000114770 | PAR-CLIP  |
| NKRF      | ENSG00000186416 | HITS-CLIP |
| MAGT1     | ENSG00000102158 | HITS-CLIP |
| GATAD1    | ENSG00000157259 | PAR-CLIP  |
| CMTM6     | ENSG00000091317 | Multiple  |
| ABHD17C   | ENSG00000136379 | PAR-CLIP  |
| NR1D2     | ENSG00000174738 | Multiple  |
| SGOL2     | ENSG00000163535 | HITS-CLIP |
| RIPK4     | ENSG00000183421 | HITS-CLIP |
| SRSF10    | ENSG00000188529 | PAR-CLIP  |
| EXOC8     | ENSG00000116903 | PAR-CLIP  |
| METTL3    | ENSG00000165819 | PAR-CLIP  |
| GPR27     | ENSG00000170837 | HITS-CLIP |
| PDZD8     | ENSG00000165650 | HITS-CLIP |
| CLSTN1    | ENSG00000171603 | HITS-CLIP |
| XRCC5     | ENSG00000079246 | HITS-CLIP |
| KMT2E     | ENSG00000005483 | Multiple  |
| USP3      | ENSG00000140455 | HITS-CLIP |
| YAE1D1    | ENSG00000241127 | PAR-CLIP  |
| PPARGC1B  | ENSG00000155846 | HITS-CLIP |
| RAB11FIP1 | ENSG00000156675 | Multiple  |
| CCNC      | ENSG00000112237 | HITS-CLIP |
| ZNF618    | ENSG00000157657 | PAR-CLIP  |
| GTF2A1    | ENSG00000165417 | HITS-CLIP |
| TANC2     | ENSG00000170921 | HITS-CLIP |
| TRIM71    | ENSG00000206557 | PAR-CLIP  |
| PHIP      | ENSG00000146247 | Multiple  |
| CPEB3     | ENSG00000107864 | PAR-CLIP  |
| ZC3H4     | ENSG00000130749 | PAR-CLIP  |
| MTF2      | ENSG00000143033 | HITS-CLIP |
| HNRNPUL1  | ENSG00000105323 | Multiple  |
| MYH6      | ENSG00000197616 | PAR-CLIP  |
| TRIM25    | ENSG00000121060 | PAR-CLIP  |
| CD55      | ENSG00000196352 | HITS-CLIP |
| TMEM55A   | ENSG00000155099 | HITS-CLIP |
| RNF213    | ENSG00000173821 | Multiple  |
| BBX       | ENSG00000114439 | PAR-CLIP  |
| OSMR      | ENSG00000145623 | HITS-CLIP |
| CSRP2     | ENSG00000175183 | HITS-CLIP |
| TRIB1     | ENSG00000173334 | Multiple  |
| MAPK1     | ENSG00000100030 | Multiple  |
| MAP3K7    | ENSG00000135341 | Multiple  |
| FNDC3A    | ENSG00000102531 | HITS-CLIP |

---

---

|           |                 |           |
|-----------|-----------------|-----------|
| SLAIN2    | ENSG00000109171 | PAR-CLIP  |
| NUP205    | ENSG00000155561 | Multiple  |
| FGF1      | ENSG00000113578 | HITS-CLIP |
| NUS1      | ENSG00000153989 | Multiple  |
| NECAB1    | ENSG00000123119 | HITS-CLIP |
| C5orf15   | ENSG00000113583 | PAR-CLIP  |
| MAPK6     | ENSG00000069956 | Multiple  |
| LATS2     | ENSG00000150457 | PAR-CLIP  |
| LNX2      | ENSG00000139517 | HITS-CLIP |
| MED6      | ENSG00000133997 | Multiple  |
| PTGFRN    | ENSG00000134247 | HITS-CLIP |
| FBXW11    | ENSG00000072803 | HITS-CLIP |
| ZNF146    | ENSG00000167635 | PAR-CLIP  |
| CSF1      | ENSG00000184371 | PAR-CLIP  |
| RANBP9    | ENSG00000010017 | Multiple  |
| AP3M1     | ENSG00000185009 | PAR-CLIP  |
| GULP1     | ENSG00000144366 | HITS-CLIP |
| SMCO4     | ENSG00000166002 | HITS-CLIP |
| KMT2C     | ENSG00000055609 | Multiple  |
| TBPL1     | ENSG00000028839 | HITS-CLIP |
| MGAT4A    | ENSG00000071073 | Multiple  |
| HELLS     | ENSG00000119969 | PAR-CLIP  |
| GCNT1     | ENSG00000187210 | PAR-CLIP  |
| HOXA10    | ENSG00000253293 | HITS-CLIP |
| C7orf31   | ENSG00000153790 | Multiple  |
| PPM1D     | ENSG00000170836 | HITS-CLIP |
| USP22     | ENSG00000124422 | Multiple  |
| ZSCAN9    | ENSG00000137185 | PAR-CLIP  |
| PATL1     | ENSG00000166889 | PAR-CLIP  |
| CPNE8     | ENSG00000139117 | PAR-CLIP  |
| SLC23A2   | ENSG00000089057 | Multiple  |
| LYSMD3    | ENSG00000176018 | PAR-CLIP  |
| DIS3      | ENSG00000083520 | PAR-CLIP  |
| TAF3      | ENSG00000165632 | PAR-CLIP  |
| COL5A2    | ENSG00000204262 | HITS-CLIP |
| C17orf104 | ENSG00000180336 | PAR-CLIP  |
| GNB4      | ENSG00000114450 | PAR-CLIP  |
| RANBP6    | ENSG00000137040 | HITS-CLIP |
| SLMO2     | ENSG00000101166 | HITS-CLIP |
| ZNF623    | ENSG00000183309 | Multiple  |
| TOP1      | ENSG00000198900 | PAR-CLIP  |
| ZNF675    | ENSG00000197372 | HITS-CLIP |
| RNF139    | ENSG00000170881 | HITS-CLIP |
| CCDC113   | ENSG00000103021 | Multiple  |

---

---

|           |                 |              |
|-----------|-----------------|--------------|
| STARD4    | ENSG00000164211 | PAR-CLIP     |
| TNKS      | ENSG00000173273 | Multiple     |
| TBL1XR1   | ENSG00000177565 | HITS-CLIP    |
| ERO1LB    | ENSG00000086619 | PAR-CLIP     |
| SETX      | ENSG00000107290 | PAR-CLIP     |
| SPOP      | ENSG00000121067 | PAR-CLIP     |
| DUSP1     | ENSG00000120129 | Multiple     |
| RNASE1    | ENSG00000129538 | HITS-CLIP    |
| IREB2     | ENSG00000136381 | PAR-CLIP     |
| BZW2      | ENSG00000136261 | HITS-CLIP    |
| SECISBP2L | ENSG00000138593 | PAR-CLIP     |
| TGFBR2    | ENSG00000163513 | HITS-CLIP    |
| SLC1A5    | ENSG00000105281 | PAR-CLIP     |
| MEF2A     | ENSG00000068305 | Multiple     |
| BICC1     | ENSG00000122870 | HITS-CLIP    |
| HIVEP3    | ENSG00000127124 | PAR-CLIP     |
| RAB14     | ENSG00000119396 | PAR-CLIP     |
| IRF1      | ENSG00000125347 | PAR-CLIP     |
| ADRB1     | ENSG00000043591 | Multiple     |
| MTSS1L    | ENSG00000132613 | HITS-CLIP    |
| PVRL1     | ENSG00000110400 | HITS-CLIP    |
| RPL15     | ENSG00000174748 | PAR-CLIP     |
| TSPAN13   | ENSG00000106537 | HITS-CLIP    |
| NPC1L1    | ENSG00000015520 | HITS-CLIP    |
| ARHGAP5   | ENSG00000100852 | PAR-CLIP     |
| RAPH1     | ENSG00000173166 | Multiple     |
| KHDRBS1   | ENSG00000121774 | HITS-CLIP    |
| RPA2      | ENSG00000117748 | PAR-CLIP     |
| USH2A     | ENSG00000042781 | PAR-CLIP     |
| AKAP11    | ENSG00000023516 | Multiple     |
| SP9       | ENSG00000217236 | PAR-CLIP     |
| BAG5      | ENSG00000166170 | HITS-CLIP    |
| SLC39A14  | ENSG00000104635 | HITS-CLIP    |
| TOMM6     | ENSG00000214736 | Multiple     |
| LPGAT1    | ENSG00000123684 | Multiple     |
| PRR11     | ENSG00000068489 | HITS-CLIP    |
| TNRC6C    | ENSG00000078687 | Multiple     |
| RNF216    | ENSG00000011275 | Multiple     |
| FAM110C   | ENSG00000184731 | PAR-CLIP     |
| MEIS1     | ENSG00000143995 | Western Blot |
| KIAA1551  | ENSG00000174718 | PAR-CLIP     |
| PNISR     | ENSG00000132424 | PAR-CLIP     |
| TMBIM6    | ENSG00000139644 | PAR-CLIP     |
| ARHGAP12  | ENSG00000165322 | PAR-CLIP     |

---

---

|                |                 |           |
|----------------|-----------------|-----------|
| FLVCR1         | ENSG00000162769 | PAR-CLIP  |
| EIF4G2         | ENSG00000110321 | Multiple  |
| BCL2L11        | ENSG00000153094 | Multiple  |
| GTF2E1         | ENSG00000153767 | PAR-CLIP  |
| NR2F2          | ENSG00000185551 | PAR-CLIP  |
| KIF5B          | ENSG00000170759 | Multiple  |
| ZNF740         | ENSG00000139651 | PAR-CLIP  |
| MYO1B          | ENSG00000128641 | PAR-CLIP  |
| LIN7C          | ENSG00000148943 | Multiple  |
| GNAI1          | ENSG00000127955 | HITS-CLIP |
| MLLT10         | ENSG00000078403 | HITS-CLIP |
| ARHGEF3        | ENSG00000163947 | HITS-CLIP |
| USP34          | ENSG00000115464 | PAR-CLIP  |
| EFHD1          | ENSG00000115468 | PAR-CLIP  |
| CD44           | ENSG00000026508 | PAR-CLIP  |
| MAP1B          | ENSG00000131711 | PAR-CLIP  |
| CD47           | ENSG00000196776 | PAR-CLIP  |
| DHX33          | ENSG00000005100 | HITS-CLIP |
| SLC29A2        | ENSG00000174669 | HITS-CLIP |
| UBR4           | ENSG00000127481 | HITS-CLIP |
| ZKSCAN1        | ENSG00000106261 | HITS-CLIP |
| LIG4           | ENSG00000174405 | HITS-CLIP |
| PPP1CB         | ENSG00000213639 | HITS-CLIP |
| TSHZ2          | ENSG00000182463 | HITS-CLIP |
| SYNCRIP        | ENSG00000135316 | Multiple  |
| MEX3C          | ENSG00000176624 | PAR-CLIP  |
| YTHDC1         | ENSG00000083896 | PAR-CLIP  |
| SCFD2          | ENSG00000184178 | HITS-CLIP |
| INO80D         | ENSG00000114933 | Multiple  |
| PANK1          | ENSG00000152782 | PAR-CLIP  |
| CUL4B          | ENSG00000158290 | PAR-CLIP  |
| NDEL1          | ENSG00000166579 | Multiple  |
| TUSC2          | ENSG00000114383 | Multiple  |
| C7orf55-LUC7L2 | ENSG00000146963 | PAR-CLIP  |
| TXNIP          | ENSG00000265972 | Multiple  |
| PCDHB16        | ENSG00000272674 | HITS-CLIP |
| ZNF792         | ENSG00000180884 | Multiple  |
| VAMP3          | ENSG00000049245 | PAR-CLIP  |
| SYNRG          | ENSG00000275066 | HITS-CLIP |
| PNLIPRP2       | ENSG00000266200 | HITS-CLIP |
| ZFP91          | ENSG00000186660 | Multiple  |
| CALU           | ENSG00000128595 | Multiple  |
| EFNB2          | ENSG00000125266 | Multiple  |
| CCNT2          | ENSG00000082258 | PAR-CLIP  |

---



---

|          |                 |           |
|----------|-----------------|-----------|
| RTN4     | ENSG00000115310 | Multiple  |
| C17orf85 | ENSG00000074356 | HITS-CLIP |
| DDI2     | ENSG00000197312 | HITS-CLIP |
| RPA1     | ENSG00000132383 | PAR-CLIP  |
| VPS13C   | ENSG00000129003 | HITS-CLIP |
| BMPER    | ENSG00000164619 | HITS-CLIP |
| RBM14    | ENSG00000239306 | HITS-CLIP |
| NSL1     | ENSG00000117697 | HITS-CLIP |
| POU2F1   | ENSG00000143190 | HITS-CLIP |
| SFT2D1   | ENSG00000198818 | HITS-CLIP |
| CDC6     | ENSG00000094804 | HITS-CLIP |
| BLZF1    | ENSG00000117475 | PAR-CLIP  |
| DUSP4    | ENSG00000120875 | HITS-CLIP |
| C22orf46 | ENSG00000184208 | HITS-CLIP |
| TMEM50A  | ENSG00000183726 | Multiple  |
| FOXJ2    | ENSG00000065970 | HITS-CLIP |
| SERTAD3  | ENSG00000167565 | HITS-CLIP |
| PPP1R37  | ENSG00000104866 | Multiple  |
| PICALM   | ENSG00000073921 | HITS-CLIP |
| JARID2   | ENSG00000008083 | Multiple  |
| MTA3     | ENSG00000057935 | HITS-CLIP |
| CTDSP1   | ENSG00000144579 | HITS-CLIP |
| FAM120A  | ENSG00000048828 | HITS-CLIP |
| SOX4     | ENSG00000124766 | Multiple  |
| CDIP1    | ENSG00000089486 | HITS-CLIP |
| PRKCA    | ENSG00000154229 | HITS-CLIP |
| CAMSAP3  | ENSG00000076826 | HITS-CLIP |
| VWA9     | ENSG00000138614 | Multiple  |
| TUBGCP3  | ENSG00000126216 | HITS-CLIP |
| SPARC    | ENSG00000113140 | HITS-CLIP |
| UGCG     | ENSG00000148154 | Multiple  |
| B3GNT5   | ENSG00000176597 | HITS-CLIP |
| RREB1    | ENSG00000124782 | HITS-CLIP |
| PDCL3    | ENSG00000115539 | HITS-CLIP |
| CEBPG    | ENSG00000153879 | Multiple  |
| SIGMAR1  | ENSG00000147955 | HITS-CLIP |
| EFCAB14  | ENSG00000159658 | HITS-CLIP |
| HS1BP3   | ENSG00000118960 | HITS-CLIP |
| NBL1     | ENSG00000158747 | HITS-CLIP |
| TBC1D13  | ENSG00000107021 | HITS-CLIP |
| CDH13    | ENSG00000140945 | HITS-CLIP |
| MTERF    | ENSG00000127989 | HITS-CLIP |
| NPDC1    | ENSG00000107281 | HITS-CLIP |
| ADAMTS4  | ENSG00000158859 | Multiple  |

---

---

|         |                 |           |
|---------|-----------------|-----------|
| SNX18   | ENSG00000178996 | Multiple  |
| ADAMTS5 | ENSG00000154736 | Multiple  |
| ERBB2   | ENSG00000141736 | Multiple  |
| LACTB   | ENSG00000103642 | HITS-CLIP |
| FAM53B  | ENSG00000189319 | HITS-CLIP |
| IRF4    | ENSG00000137265 | HITS-CLIP |
| MANEA   | ENSG00000172469 | HITS-CLIP |
| OAZ1    | ENSG00000104904 | PAR-CLIP  |
| RAP2B   | ENSG00000181467 | HITS-CLIP |
| ARID3A  | ENSG00000116017 | Multiple  |
| FAM129B | ENSG00000136830 | HITS-CLIP |
| SLC6A6  | ENSG00000131389 | HITS-CLIP |
| SIPA1L3 | ENSG00000105738 | HITS-CLIP |
| CNOT11  | ENSG00000158435 | HITS-CLIP |
| MEGF9   | ENSG00000106780 | Multiple  |
| SSH2    | ENSG00000141298 | HITS-CLIP |
| GRB10   | ENSG00000106070 | PAR-CLIP  |
| PHF20L1 | ENSG00000129292 | HITS-CLIP |
| TTL     | ENSG00000114999 | HITS-CLIP |
| BCL9    | ENSG00000116128 | HITS-CLIP |
| STOX2   | ENSG00000173320 | Multiple  |
| TACC2   | ENSG00000138162 | HITS-CLIP |
| CDR2L   | ENSG00000109089 | Multiple  |
| EZR     | ENSG00000092820 | HITS-CLIP |
| YAP1    | ENSG00000137693 | HITS-CLIP |
| HMGB3   | ENSG00000029993 | HITS-CLIP |
| SSR1    | ENSG00000124783 | HITS-CLIP |
| ELF2    | ENSG00000109381 | HITS-CLIP |
| AREL1   | ENSG00000119682 | HITS-CLIP |
| C1orf43 | ENSG00000143612 | HITS-CLIP |
| RPS28   | ENSG00000233927 | HITS-CLIP |
| AFMID   | ENSG00000183077 | HITS-CLIP |
| ALPK3   | ENSG00000136383 | HITS-CLIP |
| FUS     | ENSG00000089280 | Multiple  |
| NELFCD  | ENSG00000101158 | HITS-CLIP |
| PGR     | ENSG00000082175 | HITS-CLIP |
| FAM126B | ENSG00000155744 | HITS-CLIP |
| PWWP2A  | ENSG00000170234 | Multiple  |
| TMED2   | ENSG00000086598 | PAR-CLIP  |
| TOR2A   | ENSG00000160404 | Multiple  |
| ALDH4A1 | ENSG00000159423 | HITS-CLIP |
| POLR2C  | ENSG00000102978 | PAR-CLIP  |
| ZNF12   | ENSG00000164631 | HITS-CLIP |
| POU3F2  | ENSG00000184486 | PAR-CLIP  |

---

---

|              |                 |           |
|--------------|-----------------|-----------|
| NXPE3        | ENSG00000144815 | PAR-CLIP  |
| ACSS1        | ENSG00000154930 | HITS-CLIP |
| USP36        | ENSG00000055483 | HITS-CLIP |
| BCL3         | ENSG00000069399 | HITS-CLIP |
| AMFR         | ENSG00000159461 | HITS-CLIP |
| H2AFX        | ENSG00000188486 | Multiple  |
| NLRP2        | ENSG00000022556 | HITS-CLIP |
| CRKL         | ENSG00000099942 | HITS-CLIP |
| ATXN2L       | ENSG00000168488 | HITS-CLIP |
| MTHFD2       | ENSG00000065911 | HITS-CLIP |
| CD59         | ENSG00000085063 | Multiple  |
| PIWIL3       | ENSG00000184571 | PAR-CLIP  |
| RASA2        | ENSG00000155903 | HITS-CLIP |
| ZNF775       | ENSG00000196456 | PAR-CLIP  |
| GLDC         | ENSG00000178445 | HITS-CLIP |
| GTF3C5       | ENSG00000148308 | HITS-CLIP |
| MMS22L       | ENSG00000146263 | HITS-CLIP |
| KIF1B        | ENSG00000054523 | HITS-CLIP |
| TMED7-TICAM2 | ENSG00000251201 | HITS-CLIP |
| ZFYVE1       | ENSG00000165861 | Multiple  |
| BTBD1        | ENSG00000064726 | Multiple  |
| NT5C2        | ENSG00000076685 | HITS-CLIP |
| MBTPS1       | ENSG00000140943 | HITS-CLIP |
| WDR55        | ENSG00000120314 | PAR-CLIP  |
| WARS         | ENSG00000140105 | Multiple  |
| BRPF3        | ENSG00000096070 | Multiple  |
| HMGCR        | ENSG00000113161 | HITS-CLIP |
| SLC25A12     | ENSG00000115840 | PAR-CLIP  |
| SLC35G1      | ENSG00000176273 | PAR-CLIP  |
| EFEMP1       | ENSG00000115380 | HITS-CLIP |
| HMGA2        | ENSG00000149948 | HITS-CLIP |
| TMEM101      | ENSG00000091947 | PAR-CLIP  |
| C21orf58     | ENSG00000160298 | HITS-CLIP |
| AGO3         | ENSG00000126070 | PAR-CLIP  |
| BTN3A3       | ENSG00000111801 | PAR-CLIP  |
| PIP5K1C      | ENSG00000186111 | HITS-CLIP |
| KIAA1522     | ENSG00000162522 | Multiple  |
| ETV3         | ENSG00000117036 | Multiple  |
| ARMCX4       | ENSG00000196440 | HITS-CLIP |
| PRRG4        | ENSG00000135378 | PAR-CLIP  |
| GLRB         | ENSG00000109738 | HITS-CLIP |
| LENG8        | ENSG00000167615 | Multiple  |
| PAK2         | ENSG00000180370 | Multiple  |
| TMEM248      | ENSG00000106609 | HITS-CLIP |

---

---

|          |                 |           |
|----------|-----------------|-----------|
| TPR      | ENSG00000047410 | HITS-CLIP |
| WNT10B   | ENSG00000169884 | HITS-CLIP |
| MTUS1    | ENSG00000129422 | PAR-CLIP  |
| REST     | ENSG00000084093 | Multiple  |
| PPP2CA   | ENSG00000113575 | PAR-CLIP  |
| CEP128   | ENSG00000100629 | HITS-CLIP |
| GTF3C3   | ENSG00000119041 | HITS-CLIP |
| BCL2L13  | ENSG00000099968 | HITS-CLIP |
| ADAR     | ENSG00000160710 | Multiple  |
| COPS7B   | ENSG00000144524 | Multiple  |
| PLAGL2   | ENSG00000126003 | Multiple  |
| ZDBF2    | ENSG00000204186 | HITS-CLIP |
| AAED1    | ENSG00000158122 | Multiple  |
| LRRC8A   | ENSG00000136802 | HITS-CLIP |
| NR6A1    | ENSG00000148200 | Multiple  |
| YIPF6    | ENSG00000181704 | HITS-CLIP |
| SORT1    | ENSG00000134243 | HITS-CLIP |
| CHD8     | ENSG00000100888 | Multiple  |
| KIF3A    | ENSG00000131437 | PAR-CLIP  |
| IST1     | ENSG00000182149 | Multiple  |
| 11-Sep   | ENSG00000138758 | HITS-CLIP |
| OGT      | ENSG00000147162 | HITS-CLIP |
| C2CD2L   | ENSG00000172375 | PAR-CLIP  |
| MAZ      | ENSG00000103495 | Multiple  |
| ARHGEF12 | ENSG00000196914 | HITS-CLIP |
| SGPL1    | ENSG00000166224 | Multiple  |
| SZRD1    | ENSG00000055070 | Multiple  |
| PPP1CC   | ENSG00000186298 | PAR-CLIP  |
| DUSP6    | ENSG00000139318 | Multiple  |
| NUP133   | ENSG00000069248 | HITS-CLIP |
| MRPL34   | ENSG00000130312 | PAR-CLIP  |
| CAPNS1   | ENSG00000126247 | Multiple  |
| GDNF     | ENSG00000168621 | HITS-CLIP |
| ACTG1    | ENSG00000184009 | Multiple  |
| FOXM1    | ENSG00000111206 | HITS-CLIP |
| ZNF260   | ENSG00000254004 | PAR-CLIP  |
| SATB2    | ENSG00000119042 | PAR-CLIP  |
| PXN      | ENSG00000089159 | HITS-CLIP |
| TCEAL8   | ENSG00000180964 | HITS-CLIP |
| NUP210   | ENSG00000132182 | Multiple  |
| MAPKAP1  | ENSG00000119487 | HITS-CLIP |
| HERPUD1  | ENSG00000051108 | Multiple  |
| ANPEP    | ENSG00000166825 | HITS-CLIP |
| SPRED1   | ENSG00000166068 | PAR-CLIP  |

---

---

|          |                 |           |
|----------|-----------------|-----------|
| SH3BP2   | ENSG00000087266 | PAR-CLIP  |
| PTPN14   | ENSG00000152104 | Multiple  |
| ZFC3H1   | ENSG00000133858 | HITS-CLIP |
| TMEM63A  | ENSG00000196187 | PAR-CLIP  |
| PKM      | ENSG00000067225 | HITS-CLIP |
| SNRK     | ENSG00000163788 | Multiple  |
| PCTP     | ENSG00000141179 | Multiple  |
| NOP10    | ENSG00000182117 | HITS-CLIP |
| STX3     | ENSG00000166900 | Multiple  |
| WDR45    | ENSG00000196998 | HITS-CLIP |
| TPCN2    | ENSG00000162341 | PAR-CLIP  |
| LOXL2    | ENSG00000134013 | HITS-CLIP |
| PTPRD    | ENSG00000153707 | HITS-CLIP |
| NBEAL2   | ENSG00000160796 | HITS-CLIP |
| ZNF121   | ENSG00000197961 | HITS-CLIP |
| ANKRD50  | ENSG00000151458 | PAR-CLIP  |
| CDCA8    | ENSG00000134690 | Multiple  |
| STK11    | ENSG00000118046 | Multiple  |
| GPR180   | ENSG00000152749 | HITS-CLIP |
| HIST1H4C | ENSG00000197061 | Multiple  |
| STARD8   | ENSG00000130052 | CLASH     |
| WAC      | ENSG00000095787 | HITS-CLIP |
| IQGAP1   | ENSG00000140575 | HITS-CLIP |
| WNK1     | ENSG00000060237 | CLASH     |
| MNT      | ENSG00000070444 | HITS-CLIP |
| RUFY3    | ENSG00000018189 | Multiple  |
| PLA2G4F  | ENSG00000168907 | CLASH     |
| GSE1     | ENSG00000131149 | PAR-CLIP  |
| GPATCH2  | ENSG00000092978 | Multiple  |
| HOXB5    | ENSG00000120075 | HITS-CLIP |
| DDX42    | ENSG00000198231 | PAR-CLIP  |
| CA12     | ENSG00000074410 | Multiple  |
| SPATA13  | ENSG00000182957 | HITS-CLIP |
| ZNF562   | ENSG00000171466 | HITS-CLIP |
| MGA      | ENSG00000174197 | HITS-CLIP |
| CDH11    | ENSG00000140937 | HITS-CLIP |
| CDCA4    | ENSG00000170779 | HITS-CLIP |
| FBXO45   | ENSG00000174013 | PAR-CLIP  |
| SMEK1    | ENSG00000100796 | Multiple  |
| TMEM138  | ENSG00000149483 | PAR-CLIP  |
| GIN3     | ENSG00000181938 | PAR-CLIP  |
| PKD1     | ENSG00000008710 | HITS-CLIP |
| NBN      | ENSG00000104320 | HITS-CLIP |
| VPS36    | ENSG00000136100 | Multiple  |

---

---

|         |                 |           |
|---------|-----------------|-----------|
| IER2    | ENSG00000160888 | PAR-CLIP  |
| AKAP1   | ENSG00000121057 | PAR-CLIP  |
| AFAP1   | ENSG00000196526 | HITS-CLIP |
| CPSF6   | ENSG00000111605 | HITS-CLIP |
| ARID3B  | ENSG00000179361 | Multiple  |
| CDKN1B  | ENSG00000111276 | PAR-CLIP  |
| MYH9    | ENSG00000100345 | HITS-CLIP |
| CUL1    | ENSG00000055130 | HITS-CLIP |
| RPS6KA1 | ENSG00000117676 | Multiple  |
| DDX6    | ENSG00000110367 | PAR-CLIP  |
| ANKIB1  | ENSG00000001629 | HITS-CLIP |
| MDFIC   | ENSG00000135272 | HITS-CLIP |
| AGO2    | ENSG00000123908 | Multiple  |
| OTUB1   | ENSG00000167770 | HITS-CLIP |
| LIN28B  | ENSG00000187772 | PAR-CLIP  |
| RAB2A   | ENSG00000104388 | PAR-CLIP  |
| ZSCAN29 | ENSG00000140265 | Multiple  |
| EPG5    | ENSG00000152223 | HITS-CLIP |
| CSDE1   | ENSG00000009307 | Multiple  |
| AXIN1   | ENSG00000103126 | PAR-CLIP  |
| LMNB1   | ENSG00000113368 | HITS-CLIP |
| CDKN2B  | ENSG00000147883 | HITS-CLIP |
| TIAM1   | ENSG00000156299 | PAR-CLIP  |
| FBXL20  | ENSG00000108306 | HITS-CLIP |
| ATP1B1  | ENSG00000143153 | HITS-CLIP |
| YWHAB   | ENSG00000166913 | HITS-CLIP |
| TNFSF15 | ENSG00000181634 | HITS-CLIP |
| KLHL21  | ENSG00000162413 | HITS-CLIP |
| THRA    | ENSG00000126351 | HITS-CLIP |
| SIRT5   | ENSG00000124523 | HITS-CLIP |
| GON4L   | ENSG00000116580 | HITS-CLIP |
| DNAJC14 | ENSG00000135392 | Multiple  |
| CNST    | ENSG00000162852 | Multiple  |
| MINK1   | ENSG00000141503 | PAR-CLIP  |
| DDX17   | ENSG00000100201 | Multiple  |
| PABPC4  | ENSG00000090621 | CLASH     |
| DOCK11  | ENSG00000147251 | HITS-CLIP |
| HIST4H4 | ENSG00000197837 | HITS-CLIP |
| P4HB    | ENSG00000185624 | Multiple  |
| UGP2    | ENSG00000169764 | HITS-CLIP |
| NME2    | ENSG00000011052 | CLASH     |
| ZFH3    | ENSG00000140836 | Multiple  |
| TPX2    | ENSG00000088325 | HITS-CLIP |
| ARF1    | ENSG00000143761 | PAR-CLIP  |

---

---

|          |                 |           |
|----------|-----------------|-----------|
| COX7A2L  | ENSG00000115944 | HITS-CLIP |
| CLTC     | ENSG00000141367 | HITS-CLIP |
| C6orf48  | ENSG00000204387 | HITS-CLIP |
| ERCC6    | ENSG00000225830 | HITS-CLIP |
| IKZF4    | ENSG00000123411 | HITS-CLIP |
| PTCH2    | ENSG00000117425 | PAR-CLIP  |
| NDRG1    | ENSG00000104419 | HITS-CLIP |
| IKZF3    | ENSG00000161405 | HITS-CLIP |
| ZNF768   | ENSG00000169957 | HITS-CLIP |
| LRIG1    | ENSG00000144749 | HITS-CLIP |
| EVC      | ENSG00000072840 | HITS-CLIP |
| TAF6     | ENSG00000106290 | HITS-CLIP |
| KDM2A    | ENSG00000173120 | HITS-CLIP |
| KIAA0196 | ENSG00000164961 | PAR-CLIP  |
| MTMR2    | ENSG00000087053 | HITS-CLIP |
| QSER1    | ENSG00000060749 | PAR-CLIP  |
| HNRNPU   | ENSG00000153187 | HITS-CLIP |
| IER3IP1  | ENSG00000134049 | Multiple  |
| ATP6V1G1 | ENSG00000136888 | HITS-CLIP |
| RNF19B   | ENSG00000116514 | HITS-CLIP |
| SWSAP1   | ENSG00000173928 | PAR-CLIP  |
| SPTAN1   | ENSG00000197694 | HITS-CLIP |
| VPS37B   | ENSG00000139722 | PAR-CLIP  |
| DDX3X    | ENSG00000215301 | Multiple  |
| IGF2BP1  | ENSG00000159217 | Multiple  |
| SLC35A4  | ENSG00000176087 | Multiple  |
| ECI2     | ENSG00000198721 | HITS-CLIP |
| SERINC1  | ENSG00000111897 | PAR-CLIP  |
| TNFRSF1B | ENSG00000028137 | HITS-CLIP |
| STXBP3   | ENSG00000116266 | HITS-CLIP |
| MORF4L2  | ENSG00000123562 | Multiple  |
| RAD51D   | ENSG00000185379 | HITS-CLIP |
| RSPH3    | ENSG00000130363 | HITS-CLIP |
| APP      | ENSG00000142192 | HITS-CLIP |
| EPAS1    | ENSG00000116016 | HITS-CLIP |
| 7-Mar    | ENSG00000136536 | Multiple  |
| TAOK1    | ENSG00000160551 | PAR-CLIP  |
| ALG9     | ENSG00000086848 | Multiple  |
| CAPZA1   | ENSG00000116489 | PAR-CLIP  |
| SV2A     | ENSG00000159164 | Multiple  |
| NSUN3    | ENSG00000178694 | HITS-CLIP |
| PDS5A    | ENSG00000121892 | HITS-CLIP |
| ADIPOR2  | ENSG00000006831 | HITS-CLIP |
| FAM60A   | ENSG00000139146 | HITS-CLIP |

---

---

|          |                 |           |
|----------|-----------------|-----------|
| CAPRIN1  | ENSG00000135387 | HITS-CLIP |
| SLC3A2   | ENSG00000168003 | Multiple  |
| FAT4     | ENSG00000196159 | HITS-CLIP |
| VPS13A   | ENSG00000197969 | HITS-CLIP |
| NCOA3    | ENSG00000124151 | HITS-CLIP |
| WDR5     | ENSG00000196363 | Multiple  |
| LMTK3    | ENSG00000142235 | HITS-CLIP |
| DPM2     | ENSG00000136908 | HITS-CLIP |
| EIF3K    | ENSG00000178982 | HITS-CLIP |
| GIGYF1   | ENSG00000146830 | PAR-CLIP  |
| YWHAQ    | ENSG00000134308 | HITS-CLIP |
| NCL      | ENSG00000115053 | PAR-CLIP  |
| FAM222B  | ENSG00000173065 | PAR-CLIP  |
| MPP5     | ENSG00000072415 | HITS-CLIP |
| RHOV     | ENSG00000104140 | HITS-CLIP |
| SLC38A9  | ENSG00000177058 | HITS-CLIP |
| C15orf39 | ENSG00000167173 | HITS-CLIP |
| MFHAS1   | ENSG00000147324 | Multiple  |
| CNP      | ENSG00000173786 | HITS-CLIP |
| ZNF543   | ENSG00000178229 | Multiple  |
| FAM178A  | ENSG00000119906 | HITS-CLIP |
| RPP14    | ENSG00000163684 | Multiple  |
| SEC61A2  | ENSG00000065665 | HITS-CLIP |
| MBD3     | ENSG00000071655 | HITS-CLIP |
| PCSK7    | ENSG00000160613 | HITS-CLIP |
| VAR5     | ENSG00000204394 | PAR-CLIP  |
| HIF1AN   | ENSG00000166135 | Multiple  |
| ADAM17   | ENSG00000151694 | Multiple  |
| EEF1D    | ENSG00000104529 | Multiple  |
| MED1     | ENSG00000125686 | Multiple  |
| BCAT1    | ENSG00000060982 | HITS-CLIP |
| GRN      | ENSG00000030582 | Multiple  |
| UGT1A1   | ENSG00000242366 | HITS-CLIP |
| AMD1     | ENSG00000123505 | HITS-CLIP |
| CREB1    | ENSG00000118260 | PAR-CLIP  |
| SS18     | ENSG00000141380 | HITS-CLIP |
| BOD1L2   | ENSG00000228075 | HITS-CLIP |
| ISYNA1   | ENSG00000105655 | HITS-CLIP |
| PRR14L   | ENSG00000183530 | Multiple  |
| CHPF2    | ENSG00000033100 | HITS-CLIP |
| KLF13    | ENSG00000169926 | Multiple  |
| EDEM3    | ENSG00000116406 | HITS-CLIP |
| CD81     | ENSG00000110651 | HITS-CLIP |
| MTR      | ENSG00000116984 | HITS-CLIP |

---



---

|           |                 |           |
|-----------|-----------------|-----------|
| MLLT4     | ENSG00000130396 | Multiple  |
| ATP6V1B2  | ENSG00000147416 | HITS-CLIP |
| SLC7A1    | ENSG00000139514 | Multiple  |
| ARID2     | ENSG00000189079 | Multiple  |
| SOGA1     | ENSG00000149639 | Multiple  |
| FURIN     | ENSG00000140564 | HITS-CLIP |
| EIF2S3    | ENSG00000130741 | HITS-CLIP |
| ZBTB37    | ENSG00000185278 | PAR-CLIP  |
| MLEC      | ENSG00000110917 | HITS-CLIP |
| ZNF385A   | ENSG00000161642 | Multiple  |
| SH3BP4    | ENSG00000130147 | PAR-CLIP  |
| LARP1     | ENSG00000155506 | Multiple  |
| ITFG2     | ENSG00000111203 | HITS-CLIP |
| DMWD      | ENSG00000185800 | HITS-CLIP |
| PPL       | ENSG00000118898 | HITS-CLIP |
| TRAK2     | ENSG00000115993 | HITS-CLIP |
| CSRNP1    | ENSG00000144655 | HITS-CLIP |
| DUS1L     | ENSG00000169718 | Multiple  |
| PMAIP1    | ENSG00000141682 | Multiple  |
| POP7      | ENSG00000172336 | HITS-CLIP |
| RAB11FIP2 | ENSG00000107560 | PAR-CLIP  |
| REPIN1    | ENSG00000214022 | Multiple  |
| NUDT16L1  | ENSG00000168101 | Multiple  |
| YTHDF2    | ENSG00000198492 | Multiple  |
| MFSD9     | ENSG00000135953 | Multiple  |
| PSMG3     | ENSG00000157778 | HITS-CLIP |
| RBM39     | ENSG00000131051 | HITS-CLIP |
| KLHDC10   | ENSG00000128607 | HITS-CLIP |
| LFNG      | ENSG00000106003 | Multiple  |
| PLEKHG3   | ENSG00000126822 | HITS-CLIP |
| KCTD21    | ENSG00000188997 | PAR-CLIP  |
| S1PR3     | ENSG00000213694 | HITS-CLIP |
| CACHD1    | ENSG00000158966 | HITS-CLIP |
| GNB2      | ENSG00000172354 | HITS-CLIP |
| EEF2      | ENSG00000167658 | HITS-CLIP |
| CCDC142   | ENSG00000135637 | PAR-CLIP  |
| GANAB     | ENSG00000089597 | HITS-CLIP |
| RBM20     | ENSG00000203867 | PAR-CLIP  |
| ZNF395    | ENSG00000186918 | HITS-CLIP |
| B4GALT1   | ENSG00000086062 | Multiple  |
| STX16     | ENSG00000124222 | HITS-CLIP |
| HOMEZ     | ENSG00000215271 | PAR-CLIP  |
| RRP1      | ENSG00000160214 | HITS-CLIP |
| JUN       | ENSG00000177606 | Multiple  |

---

---

|             |                 |           |
|-------------|-----------------|-----------|
| RPS12       | ENSG00000112306 | CLASH     |
| CRTAP       | ENSG00000170275 | HITS-CLIP |
| FBXO28      | ENSG00000143756 | HITS-CLIP |
| DCP2        | ENSG00000172795 | HITS-CLIP |
| FBN2        | ENSG00000138829 | HITS-CLIP |
| LRCH2       | ENSG00000130224 | HITS-CLIP |
| TXLNA       | ENSG00000084652 | Multiple  |
| GOLGA8A     | ENSG00000175265 | HITS-CLIP |
| CTB-102L5.4 | ENSG00000267748 | HITS-CLIP |
| NCAPD2      | ENSG00000010292 | PAR-CLIP  |
| URM1        | ENSG00000167118 | HITS-CLIP |
| PPARA       | ENSG00000186951 | HITS-CLIP |
| IVL         | ENSG00000163207 | Multiple  |
| FMNL3       | ENSG00000161791 | CLASH     |
| CTNNB1      | ENSG00000168036 | PAR-CLIP  |
| ZNF805      | ENSG00000204524 | HITS-CLIP |
| UNK         | ENSG00000132478 | HITS-CLIP |
| CDCA3       | ENSG00000111665 | Multiple  |
| ACTR3       | ENSG00000115091 | HITS-CLIP |
| CTNNA1      | ENSG00000044115 | HITS-CLIP |
| RRP8        | ENSG00000132275 | PAR-CLIP  |
| AXIN2       | ENSG00000168646 | HITS-CLIP |
| TRIM65      | ENSG00000141569 | HITS-CLIP |
| GFPT1       | ENSG00000198380 | HITS-CLIP |
| PABPC3      | ENSG00000151846 | HITS-CLIP |
| EPOR        | ENSG00000187266 | Multiple  |
| SEC24C      | ENSG00000176986 | HITS-CLIP |
| SBNO1       | ENSG00000139697 | HITS-CLIP |
| BHLHE40     | ENSG00000134107 | PAR-CLIP  |
| NPEPPS      | ENSG00000141279 | PAR-CLIP  |
| COL18A1     | ENSG00000182871 | HITS-CLIP |
| POGK        | ENSG00000143157 | HITS-CLIP |
| RAPGEF2     | ENSG00000109756 | PAR-CLIP  |
| PRR14       | ENSG00000156858 | HITS-CLIP |
| SEC23B      | ENSG00000101310 | Multiple  |
| NFATC2IP    | ENSG00000176953 | HITS-CLIP |
| RNPS1       | ENSG00000205937 | HITS-CLIP |
| IGFBP4      | ENSG00000141753 | HITS-CLIP |
| DYNC1LI2    | ENSG00000135720 | PAR-CLIP  |
| IFRD2       | ENSG00000214706 | PAR-CLIP  |
| E2F3        | ENSG00000112242 | Multiple  |
| SMARCA5     | ENSG00000153147 | HITS-CLIP |
| TSPAN15     | ENSG00000099282 | HITS-CLIP |
| SACS        | ENSG00000151835 | HITS-CLIP |

---

---

|           |                 |           |
|-----------|-----------------|-----------|
| HIST1H2AG | ENSG00000196787 | PAR-CLIP  |
| GTF2IRD1  | ENSG00000006704 | HITS-CLIP |
| PLXNB3    | ENSG00000198753 | PAR-CLIP  |
| ZC3H7B    | ENSG00000100403 | HITS-CLIP |
| RIT1      | ENSG00000143622 | HITS-CLIP |
| STS       | ENSG00000101846 | HITS-CLIP |
| KIDINS220 | ENSG00000134313 | HITS-CLIP |
| DESI2     | ENSG00000121644 | PAR-CLIP  |
| DLC1      | ENSG00000164741 | HITS-CLIP |
| ACTR2     | ENSG00000138071 | PAR-CLIP  |
| IRS4      | ENSG00000133124 | HITS-CLIP |
| FAM120AOS | ENSG00000188938 | HITS-CLIP |
| QKI       | ENSG00000112531 | HITS-CLIP |
| UBE3C     | ENSG00000009335 | HITS-CLIP |
| CENPF     | ENSG00000117724 | PAR-CLIP  |
| SON       | ENSG00000159140 | Multiple  |
| ASPHD1    | ENSG00000174939 | HITS-CLIP |
| TMEM14C   | ENSG00000111843 | HITS-CLIP |
| TXNRD1    | ENSG00000198431 | HITS-CLIP |
| BCKDK     | ENSG00000103507 | HITS-CLIP |
| TP53INP1  | ENSG00000164938 | Multiple  |
| ELMSAN1   | ENSG00000156030 | PAR-CLIP  |
| LIFR      | ENSG00000113594 | HITS-CLIP |
| HOXA3     | ENSG00000105997 | Multiple  |
| DIAPH1    | ENSG00000131504 | HITS-CLIP |
| ATXN1     | ENSG00000124788 | Multiple  |
| EPS15     | ENSG00000085832 | HITS-CLIP |
| DENND5B   | ENSG00000170456 | PAR-CLIP  |
| AGPS      | ENSG00000018510 | HITS-CLIP |
| STK35     | ENSG00000125834 | Multiple  |
| ANKRD42   | ENSG00000137494 | HITS-CLIP |
| MYL9      | ENSG00000101335 | HITS-CLIP |
| ZNF460    | ENSG00000197714 | Multiple  |
| BIRC6     | ENSG00000115760 | Multiple  |
| SPAG9     | ENSG00000008294 | HITS-CLIP |
| KRT10     | ENSG00000186395 | qPCR      |
| KRT5      | ENSG00000186081 | qPCR      |
| FCHO2     | ENSG00000157107 | HITS-CLIP |
| KIAA1462  | ENSG00000165757 | HITS-CLIP |
| SET       | ENSG00000119335 | PAR-CLIP  |
| PSMD14    | ENSG00000115233 | PAR-CLIP  |
| SLC11A2   | ENSG00000110911 | HITS-CLIP |
| WASF2     | ENSG00000158195 | HITS-CLIP |
| FBXO10    | ENSG00000147912 | HITS-CLIP |

---

---

|           |                 |           |
|-----------|-----------------|-----------|
| GABARAPL1 | ENSG00000139112 | PAR-CLIP  |
| MPDU1     | ENSG00000129255 | HITS-CLIP |
| EIF1B     | ENSG00000114784 | HITS-CLIP |
| ZC3H13    | ENSG00000123200 | HITS-CLIP |
| SHISA5    | ENSG00000164054 | HITS-CLIP |
| XYLT2     | ENSG00000015532 | Multiple  |
| NOL4L     | ENSG00000197183 | HITS-CLIP |
| SIM1      | ENSG00000112246 | PAR-CLIP  |
| COPZ1     | ENSG00000111481 | Multiple  |
| CDYL2     | ENSG00000166446 | HITS-CLIP |
| FLNA      | ENSG00000196924 | HITS-CLIP |
| ELOVL5    | ENSG00000012660 | Multiple  |
| HIATL1    | ENSG00000148110 | HITS-CLIP |
| SLC39A9   | ENSG00000029364 | Multiple  |
| TIMM13    | ENSG00000099800 | HITS-CLIP |
| MUC1      | ENSG00000185499 | Multiple  |
| CDC42BPA  | ENSG00000143776 | HITS-CLIP |
| NCOA2     | ENSG00000140396 | HITS-CLIP |
| TMEM177   | ENSG00000144120 | Multiple  |
| HIST1H4H  | ENSG00000158406 | HITS-CLIP |
| KCMF1     | ENSG00000176407 | PAR-CLIP  |
| ZFP62     | ENSG00000196670 | HITS-CLIP |
| GPRIN1    | ENSG00000169258 | HITS-CLIP |
| TEAD1     | ENSG00000187079 | HITS-CLIP |
| SLFN13    | ENSG00000154760 | HITS-CLIP |
| AEN       | ENSG00000181026 | PAR-CLIP  |
| SMARCC1   | ENSG00000173473 | HITS-CLIP |
| CFLAR     | ENSG00000003402 | Multiple  |
| FAM118A   | ENSG00000100376 | Multiple  |
| GGCX      | ENSG00000115486 | HITS-CLIP |
| PHC2      | ENSG00000134686 | HITS-CLIP |
| FBXL19    | ENSG00000099364 | HITS-CLIP |
| NRP1      | ENSG00000099250 | HITS-CLIP |
| SEMA4C    | ENSG00000168758 | Multiple  |
| ZNF280D   | ENSG00000137871 | PAR-CLIP  |
| CHAC1     | ENSG00000128965 | HITS-CLIP |
| SRRM2     | ENSG00000167978 | HITS-CLIP |
| KLHL15    | ENSG00000174010 | PAR-CLIP  |
| SENP1     | ENSG00000079387 | HITS-CLIP |
| EEF1A1    | ENSG00000156508 | PAR-CLIP  |
| PLEKHM3   | ENSG00000178385 | PAR-CLIP  |
| TMEM259   | ENSG00000182087 | HITS-CLIP |
| DDX5      | ENSG00000108654 | Multiple  |
| EIF5B     | ENSG00000158417 | HITS-CLIP |

---

---

|           |                 |           |
|-----------|-----------------|-----------|
| LZTS2     | ENSG00000107816 | HITS-CLIP |
| INSR      | ENSG00000171105 | PAR-CLIP  |
| FLG       | ENSG00000143631 | qPCR      |
| ZSWIM4    | ENSG00000132003 | HITS-CLIP |
| STC2      | ENSG00000113739 | Multiple  |
| PTP4A1    | ENSG00000112245 | Multiple  |
| KMT2D     | ENSG00000167548 | Multiple  |
| SEPN1     | ENSG00000162430 | HITS-CLIP |
| POP1      | ENSG00000104356 | HITS-CLIP |
| PEA15     | ENSG00000162734 | PAR-CLIP  |
| SAE1      | ENSG00000142230 | HITS-CLIP |
| PPP1R9B   | ENSG00000108819 | HITS-CLIP |
| BMP2      | ENSG00000125845 | HITS-CLIP |
| YRDC      | ENSG00000196449 | Multiple  |
| AKAP2     | ENSG00000241978 | CLASH     |
| TNFRSF10B | ENSG00000120889 | Multiple  |
| KDELR1    | ENSG00000105438 | HITS-CLIP |
| FAM210B   | ENSG00000124098 | HITS-CLIP |
| PUS7      | ENSG00000091127 | HITS-CLIP |
| FAM199X   | ENSG00000123575 | CLASH     |
| TMEM2     | ENSG00000135048 | Multiple  |
| LYPLA2    | ENSG00000011009 | Multiple  |
| BUB1B     | ENSG00000156970 | HITS-CLIP |
| DYNLL2    | ENSG00000264364 | PAR-CLIP  |
| BCL2L12   | ENSG00000126453 | Multiple  |
| PPP1R12C  | ENSG00000125503 | Multiple  |
| LCLAT1    | ENSG00000172954 | HITS-CLIP |
| FIGN      | ENSG00000182263 | HITS-CLIP |
| STRN      | ENSG00000115808 | Multiple  |
| SMARCD2   | ENSG00000108604 | HITS-CLIP |
| CDK13     | ENSG00000065883 | HITS-CLIP |
| ZNF398    | ENSG00000197024 | PAR-CLIP  |
| SDK2      | ENSG00000069188 | HITS-CLIP |
| DSG2      | ENSG00000046604 | Multiple  |
| YY1       | ENSG00000100811 | PAR-CLIP  |
| SLC16A6   | ENSG00000108932 | HITS-CLIP |
| SP1       | ENSG00000185591 | Multiple  |
| MCRS1     | ENSG00000187778 | HITS-CLIP |
| MFSD5     | ENSG00000182544 | HITS-CLIP |
| SEMA4B    | ENSG00000185033 | HITS-CLIP |
| PSMB1     | ENSG00000008018 | Multiple  |
| B3GALTL   | ENSG00000187676 | HITS-CLIP |
| KRT80     | ENSG00000167767 | HITS-CLIP |
| SMIM13    | ENSG00000224531 | HITS-CLIP |

---

---

|          |                 |           |
|----------|-----------------|-----------|
| GTPBP2   | ENSG00000172432 | Multiple  |
| AKIRIN1  | ENSG00000174574 | Multiple  |
| UCHL3    | ENSG00000118939 | Multiple  |
| MAX      | ENSG00000125952 | HITS-CLIP |
| GCSAM    | ENSG00000174500 | PAR-CLIP  |
| RASSF3   | ENSG00000153179 | Multiple  |
| TNKS1BP1 | ENSG00000149115 | Multiple  |
| GFM1     | ENSG00000168827 | HITS-CLIP |
| STX6     | ENSG00000135823 | HITS-CLIP |
| PEX13    | ENSG00000162928 | HITS-CLIP |
| NFE2L1   | ENSG00000082641 | HITS-CLIP |
| TSPAN14  | ENSG00000108219 | Multiple  |
| KLC2     | ENSG00000174996 | HITS-CLIP |
| DGKB     | ENSG00000136267 | HITS-CLIP |
| RCE1     | ENSG00000173653 | HITS-CLIP |
| SUN1     | ENSG00000164828 | PAR-CLIP  |
| BBC3     | ENSG00000105327 | Multiple  |
| ZNF35    | ENSG00000169981 | HITS-CLIP |
| MGEA5    | ENSG00000198408 | HITS-CLIP |
| ZBTB7A   | ENSG00000178951 | HITS-CLIP |
| THUMPD1  | ENSG00000066654 | PAR-CLIP  |
| PARP12   | ENSG00000059378 | PAR-CLIP  |
| TWISTNB  | ENSG00000105849 | PAR-CLIP  |
| CLN6     | ENSG00000128973 | HITS-CLIP |
| C18orf54 | ENSG00000166845 | PAR-CLIP  |
| CDK12    | ENSG00000167258 | HITS-CLIP |
| POMK     | ENSG00000185900 | HITS-CLIP |
| CNOT1    | ENSG00000125107 | Multiple  |
| ZNF281   | ENSG00000162702 | Multiple  |
| FNDC4    | ENSG00000115226 | HITS-CLIP |
| WHSC1    | ENSG00000109685 | HITS-CLIP |
| STARD13  | ENSG00000133121 | HITS-CLIP |
| INO80    | ENSG00000128908 | PAR-CLIP  |
| COX10    | ENSG00000006695 | HITS-CLIP |
| CREB3L2  | ENSG00000182158 | Multiple  |
| SCAF11   | ENSG00000139218 | Multiple  |
| PARP1    | ENSG00000143799 | Multiple  |
| SEC24B   | ENSG00000138802 | Multiple  |
| CD4      | ENSG00000010610 | HITS-CLIP |
| RNF167   | ENSG00000108523 | Multiple  |
| BRPF1    | ENSG00000156983 | Multiple  |
| SUZ12    | ENSG00000178691 | PAR-CLIP  |
| ARCN1    | ENSG00000095139 | PAR-CLIP  |
| PDGFD    | ENSG00000170962 | HITS-CLIP |

---

---

|             |                 |           |
|-------------|-----------------|-----------|
| RC3H1       | ENSG00000135870 | Multiple  |
| BSG         | ENSG00000172270 | HITS-CLIP |
| CDC27       | ENSG00000004897 | PAR-CLIP  |
| SEC23IP     | ENSG00000107651 | Multiple  |
| CAPN15      | ENSG00000103326 | HITS-CLIP |
| GPSM2       | ENSG00000121957 | HITS-CLIP |
| SCD         | ENSG00000099194 | HITS-CLIP |
| SUV420H2    | ENSG00000133247 | Multiple  |
| EDC3        | ENSG00000179151 | HITS-CLIP |
| KIF18B      | ENSG00000186185 | PAR-CLIP  |
| IL6ST       | ENSG00000134352 | HITS-CLIP |
| KDM7A       | ENSG00000006459 | HITS-CLIP |
| PLEKHA1     | ENSG00000107679 | HITS-CLIP |
| FAM102A     | ENSG00000167106 | HITS-CLIP |
| ZNF704      | ENSG00000164684 | HITS-CLIP |
| KIAA0368    | ENSG00000136813 | HITS-CLIP |
| PHF16       | ENSG00000102221 | PAR-CLIP  |
| UBAP2L      | ENSG00000143569 | HITS-CLIP |
| ZBTB48      | ENSG00000204859 | HITS-CLIP |
| VWA5A       | ENSG00000110002 | HITS-CLIP |
| CHD5        | ENSG00000116254 | HITS-CLIP |
| UBN1        | ENSG00000118900 | HITS-CLIP |
| SEC22C      | ENSG00000093183 | PAR-CLIP  |
| IGSF3       | ENSG00000143061 | HITS-CLIP |
| VPS37C      | ENSG00000167987 | HITS-CLIP |
| DDR1        | ENSG00000204580 | HITS-CLIP |
| DHX9        | ENSG00000135829 | HITS-CLIP |
| TIMM44      | ENSG00000104980 | HITS-CLIP |
| STARD7      | ENSG00000084090 | HITS-CLIP |
| UBN2        | ENSG00000157741 | PAR-CLIP  |
| GATAD2B     | ENSG00000143614 | Multiple  |
| ABHD3       | ENSG00000158201 | HITS-CLIP |
| EPS15L1     | ENSG00000127527 | HITS-CLIP |
| COBL        | ENSG00000106078 | HITS-CLIP |
| LRIF1       | ENSG00000121931 | HITS-CLIP |
| COG3        | ENSG00000136152 | HITS-CLIP |
| PPAN-P2RY11 | ENSG00000243207 | HITS-CLIP |
| RBM12B      | ENSG00000183808 | HITS-CLIP |
| SUPV3L1     | ENSG00000156502 | HITS-CLIP |
| ZBTB14      | ENSG00000198081 | HITS-CLIP |
| SLC25A19    | ENSG00000125454 | HITS-CLIP |
| TNFRSF12A   | ENSG00000006327 | HITS-CLIP |
| ARF6        | ENSG00000165527 | HITS-CLIP |
| TMEM201     | ENSG00000188807 | HITS-CLIP |

---

---

|          |                 |           |
|----------|-----------------|-----------|
| PDXDC1   | ENSG00000179889 | HITS-CLIP |
| EIF6     | ENSG00000242372 | HITS-CLIP |
| CSPG4    | ENSG00000173546 | PAR-CLIP  |
| PLD3     | ENSG00000105223 | PAR-CLIP  |
| CCDC80   | ENSG00000091986 | Multiple  |
| CHAMP1   | ENSG00000198824 | HITS-CLIP |
| MON1B    | ENSG00000103111 | HITS-CLIP |
| CARM1    | ENSG00000142453 | Multiple  |
| EIF4EBP2 | ENSG00000148730 | Multiple  |
| PDZD11   | ENSG00000120509 | Multiple  |
| LDLR     | ENSG00000130164 | PAR-CLIP  |
| EPO      | ENSG00000130427 | Multiple  |
| EIF1AD   | ENSG00000175376 | HITS-CLIP |
| POLG     | ENSG00000140521 | PAR-CLIP  |
| PER2     | ENSG00000132326 | Multiple  |
| NUP155   | ENSG00000113569 | HITS-CLIP |
| ZNF483   | ENSG00000173258 | HITS-CLIP |
| LRP3     | ENSG00000130881 | HITS-CLIP |
| ADARB1   | ENSG00000197381 | HITS-CLIP |
| TNPO2    | ENSG00000105576 | Multiple  |
| EMD      | ENSG00000102119 | HITS-CLIP |
| ATP2A2   | ENSG00000174437 | HITS-CLIP |
| AHNAK    | ENSG00000124942 | Multiple  |
| YTHDF3   | ENSG00000185728 | Multiple  |
| SH2B1    | ENSG00000178188 | HITS-CLIP |
| DGKD     | ENSG00000077044 | HITS-CLIP |
| SMAD7    | ENSG00000101665 | Multiple  |
| UBE2W    | ENSG00000104343 | HITS-CLIP |
| NDUFS7   | ENSG00000115286 | PAR-CLIP  |
| MKNK2    | ENSG00000099875 | Multiple  |
| PPIF     | ENSG00000108179 | Multiple  |
| ADD1     | ENSG00000087274 | PAR-CLIP  |
| OSBPL8   | ENSG00000091039 | HITS-CLIP |
| PLEKHA6  | ENSG00000143850 | HITS-CLIP |
| AURKB    | ENSG00000178999 | CLASH     |
| ZNF106   | ENSG00000103994 | HITS-CLIP |
| FAM134A  | ENSG00000144567 | Multiple  |
| GPR157   | ENSG00000180758 | HITS-CLIP |
| KHNYN    | ENSG00000100441 | Multiple  |
| MOAP1    | ENSG00000165943 | HITS-CLIP |
| FAM65A   | ENSG00000039523 | HITS-CLIP |
| LEPROT   | ENSG00000213625 | HITS-CLIP |
| PTAR1    | ENSG00000188647 | PAR-CLIP  |
| LAMP1    | ENSG00000185896 | HITS-CLIP |

---



---

|           |                 |           |
|-----------|-----------------|-----------|
| FGFR2     | ENSG00000066468 | Multiple  |
| MOB1A     | ENSG00000114978 | Multiple  |
| PRDM4     | ENSG00000110851 | PAR-CLIP  |
| VCPIP1    | ENSG00000175073 | HITS-CLIP |
| GFOD2     | ENSG00000141098 | PAR-CLIP  |
| ACIN1     | ENSG00000100813 | HITS-CLIP |
| TTC9C     | ENSG00000162222 | HITS-CLIP |
| SNX5      | ENSG00000089006 | Multiple  |
| EHD1      | ENSG00000110047 | Multiple  |
| C10orf76  | ENSG00000120029 | HITS-CLIP |
| LSM14B    | ENSG00000149657 | PAR-CLIP  |
| NME1      | ENSG00000239672 | HITS-CLIP |
| XPO1      | ENSG00000082898 | Multiple  |
| EPHA4     | ENSG00000116106 | PAR-CLIP  |
| UNC13B    | ENSG00000198722 | HITS-CLIP |
| PHIP      | ENSG00000146247 | HITS-CLIP |
| SCNN1A    | ENSG00000111319 | HITS-CLIP |
| VEGFA     | ENSG00000112715 | Multiple  |
| PCF11     | ENSG00000165494 | PAR-CLIP  |
| NFATC3    | ENSG00000072736 | HITS-CLIP |
| FGFR1     | ENSG00000077782 | HITS-CLIP |
| HNRNPUL1  | ENSG00000105323 | PAR-CLIP  |
| ATL3      | ENSG00000184743 | HITS-CLIP |
| FAM160A2  | ENSG00000051009 | HITS-CLIP |
| AP1B1     | ENSG00000100280 | HITS-CLIP |
| IRAK1     | ENSG00000184216 | Multiple  |
| DAAM1     | ENSG00000100592 | HITS-CLIP |
| RNF213    | ENSG00000173821 | HITS-CLIP |
| CTPS1     | ENSG00000171793 | HITS-CLIP |
| MUM1      | ENSG00000160953 | PAR-CLIP  |
| EXOC7     | ENSG00000182473 | HITS-CLIP |
| DYNC2H1   | ENSG00000187240 | HITS-CLIP |
| TRIB1     | ENSG00000173334 | PAR-CLIP  |
| NSFL1C    | ENSG00000088833 | HITS-CLIP |
| NIPBL     | ENSG00000164190 | HITS-CLIP |
| DNTTIP2   | ENSG00000067334 | Multiple  |
| HIST1H2AC | ENSG00000180573 | Multiple  |
| SRF       | ENSG00000112658 | HITS-CLIP |
| C22orf29  | ENSG00000215012 | Multiple  |
| PPP2R1B   | ENSG00000137713 | HITS-CLIP |
| ABL2      | ENSG00000143322 | Multiple  |
| ZHX1      | ENSG00000165156 | PAR-CLIP  |
| TET2      | ENSG00000168769 | HITS-CLIP |
| SERPINE1  | ENSG00000106366 | Multiple  |

---

---

|          |                 |           |
|----------|-----------------|-----------|
| SCARB2   | ENSG00000138760 | PAR-CLIP  |
| CDK16    | ENSG00000102225 | Multiple  |
| PUS1     | ENSG00000177192 | PAR-CLIP  |
| HELLS    | ENSG00000119969 | HITS-CLIP |
| GCNT1    | ENSG00000187210 | Multiple  |
| ZNF654   | ENSG00000175105 | HITS-CLIP |
| SNX17    | ENSG00000115234 | HITS-CLIP |
| PCDH9    | ENSG00000184226 | PAR-CLIP  |
| IBA57    | ENSG00000181873 | PAR-CLIP  |
| ATP5G2   | ENSG00000135390 | Multiple  |
| PARD6B   | ENSG00000124171 | Multiple  |
| PDHB     | ENSG00000168291 | PAR-CLIP  |
| SLC25A33 | ENSG00000171612 | PAR-CLIP  |
| GPR107   | ENSG00000148358 | Multiple  |
| MAPKAPK2 | ENSG00000162889 | HITS-CLIP |
| SIM2     | ENSG00000159263 | PAR-CLIP  |
| BRWD1    | ENSG00000185658 | Multiple  |
| LETM1    | ENSG00000168924 | HITS-CLIP |
| SOX12    | ENSG00000177732 | HITS-CLIP |
| LYPLA1   | ENSG00000120992 | HITS-CLIP |
| SLC1A5   | ENSG00000105281 | Multiple  |
| FBXO48   | ENSG00000204923 | PAR-CLIP  |
| TECR     | ENSG00000099797 | PAR-CLIP  |
| RAB14    | ENSG00000119396 | HITS-CLIP |
| ORC5     | ENSG00000164815 | HITS-CLIP |
| TMEM126A | ENSG00000171202 | PAR-CLIP  |
| TMEM200A | ENSG00000164484 | HITS-CLIP |
| MED22    | ENSG00000148297 | Multiple  |
| PRRC2A   | ENSG00000204469 | HITS-CLIP |
| MBOAT2   | ENSG00000143797 | HITS-CLIP |
| XKR8     | ENSG00000158156 | PAR-CLIP  |
| NUP37    | ENSG00000075188 | PAR-CLIP  |
| ELOVL4   | ENSG00000118402 | PAR-CLIP  |
| DYNLRB1  | ENSG00000125971 | HITS-CLIP |
| ARMCX2   | ENSG00000184867 | HITS-CLIP |
| CMPK1    | ENSG00000162368 | PAR-CLIP  |
| MTDH     | ENSG00000147649 | HITS-CLIP |
| TNRC6C   | ENSG00000078687 | HITS-CLIP |
| SYVN1    | ENSG00000162298 | HITS-CLIP |
| MYLK     | ENSG00000065534 | HITS-CLIP |
| INTS5    | ENSG00000185085 | HITS-CLIP |
| SUV39H1  | ENSG00000101945 | HITS-CLIP |
| ULBP1    | ENSG00000111981 | HITS-CLIP |
| RTN3     | ENSG00000133318 | HITS-CLIP |

---

---

|                |                 |           |
|----------------|-----------------|-----------|
| TMBIM6         | ENSG00000139644 | Multiple  |
| NNT            | ENSG00000112992 | Multiple  |
| EIF4G2         | ENSG00000110321 | HITS-CLIP |
| CLOCK          | ENSG00000134852 | HITS-CLIP |
| ZNF703         | ENSG00000183779 | PAR-CLIP  |
| KBTBD7         | ENSG00000120696 | PAR-CLIP  |
| ZMYND8         | ENSG00000101040 | HITS-CLIP |
| LSM4           | ENSG00000130520 | Multiple  |
| KIF5B          | ENSG00000170759 | HITS-CLIP |
| C8orf88        | ENSG00000253250 | PAR-CLIP  |
| MYO1B          | ENSG00000128641 | HITS-CLIP |
| PRRX1          | ENSG00000116132 | HITS-CLIP |
| SIN3A          | ENSG00000169375 | PAR-CLIP  |
| USP34          | ENSG00000115464 | Multiple  |
| EFHD1          | ENSG00000115468 | HITS-CLIP |
| NPTX1          | ENSG00000171246 | HITS-CLIP |
| ATR            | ENSG00000175054 | HITS-CLIP |
| MAP1B          | ENSG00000131711 | HITS-CLIP |
| DHX33          | ENSG00000005100 | Multiple  |
| NUDT19         | ENSG00000213965 | HITS-CLIP |
| CDC25A         | ENSG00000164045 | HITS-CLIP |
| ANAPC16        | ENSG00000166295 | PAR-CLIP  |
| TBR1           | ENSG00000136535 | PAR-CLIP  |
| RPL8           | ENSG00000161016 | HITS-CLIP |
| ELF1           | ENSG00000120690 | Multiple  |
| KMT2B          | ENSG00000272333 | HITS-CLIP |
| HIST1H4E       | ENSG00000276966 | Multiple  |
| PIGW           | ENSG00000277161 | PAR-CLIP  |
| HIST1H4B       | ENSG00000278705 | Multiple  |
| ZNF776         | ENSG00000152443 | PAR-CLIP  |
| PIP4K2B        | ENSG00000276293 | Multiple  |
| NR4A1          | ENSG00000123358 | HITS-CLIP |
| PALM2-AKAP2    | ENSG00000157654 | Multiple  |
| RASL10B        | ENSG00000270885 | HITS-CLIP |
| PSG7           | ENSG00000221878 | HITS-CLIP |
| TMEM189-UBE2V1 | ENSG00000124208 | HITS-CLIP |
| HIST1H4D       | ENSG00000277157 | Multiple  |
| HIST1H2AD      | ENSG00000196866 | Multiple  |
| MUC16          | ENSG00000181143 | HITS-CLIP |
| BRD4           | ENSG00000141867 | PAR-CLIP  |
| RASSF5         | ENSG00000266094 | HITS-CLIP |

---

Table S5. Upregulated DEMs shared between benign PNs, AIS/MIA, and invasive adenocarcinomas.

| Categories                                                     | Total | Elements                                                                                                                       |
|----------------------------------------------------------------|-------|--------------------------------------------------------------------------------------------------------------------------------|
| Benign vs AIS/MIA<br>Benign vs Invasive<br>AIS/MIA vs Invasive | 2     | Let-7b-3p, miR-125b-5p                                                                                                         |
| Benign vs AIS/MIA<br>Benign vs Invasive                        | 6     | miR-10b-5p, miR-92b-3p, miR-10a-5p, miR-328-3p, miR-1228-5p, miR-99a-5p                                                        |
| AIS/MIA vs Invasive<br>Benign vs Invasive                      | 1     | miR-100-5p                                                                                                                     |
| Benign vs Invasive                                             | 11    | miR-125a-5p, miR139-5p, miR-27b-3p, miR-193a-5p, miR-99b-5p, miR-122-5p, let7d-3p, miR-483-5p, miR-150-5p, miR-3168, miR-24-3p |
| Benign vs AIS/MIA                                              | 3     | miR-30d-5p, miR-625-3p, miR-423-3p                                                                                             |
| AIS/MIA vs Invasive                                            | 3     | miR-126-5p, miR-30c-5p, miR-152-3p                                                                                             |

Table S6. Down-regulated DEMs shared between benign PNs, AIS/MIA, and invasive adenocarcinomas.

| <b>Categories</b>                         | <b>Total</b> | <b>Elements</b>                                                                    |
|-------------------------------------------|--------------|------------------------------------------------------------------------------------|
| Benign vs AIS/MIA<br>Benign vs Invasive   | 7            | miR-30e-5p, miR-502-3p, miR-503-5p, miR-101-3p, miR-144-3p, let-7g-5p, miR-500a-3p |
| Benign vs Invasive<br>AIS/MIA vs Invasive | 3            | miR-7-5p, miR-532-5p, miR-361-3p                                                   |
| Benign vs Invasive                        | 7            | miR-16-5p, miR-186-5p, miR-399-3p, let-7i-5p, miR-19a-3p, miR-148b-3p, miR-363-3p  |
| Benign vs AIS/MIA                         | 4            | miR-21-5p, miR-103a-3p, miR-144-5p, miR-107                                        |
| AIS/MIA vs Invasive                       | 6            | miR-486-3p, miR-25-3p, miR-106-3p, miR-223-5p, miR-128-3p, let-7b-5p               |

Table S7. Quality control of small RNA sequencing.

| SampleID     | Cohort   | Total number of reads | Number of mapped reads | Mapping rate (%) | miRNA Mapping rate (%) | antisense Mapping rate (%) | intergenic Mapping rate (%) | intron Mapping rate (%) | lincRNA Mapping rate (%) | protein_coding Mapping | rRNA Mapping rate (%) |
|--------------|----------|-----------------------|------------------------|------------------|------------------------|----------------------------|-----------------------------|-------------------------|--------------------------|------------------------|-----------------------|
| Training_P01 | Training | 6420144               | 6210073                | 96.727939        | 65.012314              | 2.0837785                  | 1.5915433                   | 17.678359               | 0.1438228                | 2.4432966              | 0.0858739             |
| Training_P02 | Training | 7030808               | 6755119                | 96.078843        | 64.192956              | 2.8275347                  | 1.7637883                   | 20.020713               | 0.1046466                | 2.9181993              | 0.1219075             |
| Training_P03 | Training | 6388398               | 6110294                | 95.646733        | 60.463925              | 2.3611753                  | 2.028724                    | 22.534611               | 0.1511766                | 2.9894934              | 0.134969              |
| Training_P04 | Training | 7968751               | 7717493                | 96.846959        | 49.200815              | 2.8234039                  | 1.6111191                   | 17.831581               | 0.0859476                | 2.5577315              | 0.1020236             |
| Training_P05 | Training | 5738301               | 5491814                | 95.70453         | 62.679762              | 2.9450105                  | 2.2837081                   | 24.395582               | 0.1207676                | 3.411605               | 0.1059031             |
| Training_P06 | Training | 8368425               | 8058830                | 96.300439        | 63.96921               | 2.9020238                  | 1.725449                    | 19.163055               | 0.0943458                | 2.6005895              | 0.1821625             |
| Training_P07 | Training | 8580149               | 7999226                | 93.229453        | 47.175842              | 4.0311733                  | 5.302138                    | 38.126264               | 0.1297751                | 3.104765               | 0.09448               |
| Training_P08 | Training | 7305660               | 6740400                | 92.262711        | 42.766912              | 4.0512198                  | 5.5316153                   | 39.486855               | 0.1253041                | 4.3110201              | 0.1194909             |
| Training_P09 | Training | 8717943               | 8215254                | 94.233858        | 52.820398              | 3.4828179                  | 4.3877889                   | 32.214817               | 0.1141292                | 3.3010533              | 0.154132              |
| Training_P10 | Training | 6641324               | 6453619                | 97.173681        | 74.478294              | 1.8669886                  | 1.4142298                   | 16.040271               | 0.1004682                | 2.3355397              | 0.0930021             |
| Training_P11 | Training | 8622964               | 8033675                | 93.166051        | 40.549977              | 4.5837241                  | 6.2496803                   | 43.603482               | 0.1424182                | 3.0840078              | 0.0987946             |
| Training_P12 | Training | 8062412               | 7618913                | 94.499177        | 44.503628              | 4.0110884                  | 6.0069199                   | 40.136723               | 0.1571834                | 3.1294075              | 0.1155283             |
| Training_P13 | Training | 8173494               | 7975203                | 97.573975        | 73.057745              | 1.4425443                  | 1.270789                    | 14.931607               | 0.1054707                | 2.4946899              | 0.057497              |
| Training_P14 | Training | 8334820               | 7989530                | 95.857259        | 59.341459              | 2.7660263                  | 1.7094497                   | 20.521395               | 0.085625                 | 2.5983468              | 0.0786905             |
| Training_P15 | Training | 8692719               | 8265328                | 95.083345        | 55.904669              | 3.1158534                  | 4.3687679                   | 30.933836               | 0.1132784                | 2.8040871              | 0.0951505             |
| Training_P16 | Training | 10023971              | 9679886                | 96.567378        | 68.50353               | 2.6603688                  | 2.8110455                   | 20.500551               | 0.0877438                | 2.3409108              | 0.09106               |
| Training_P17 | Training | 7985174               | 7792781                | 97.590622        | 74.767877              | 1.6009946                  | 1.175357                    | 14.527766               | 0.0843259                | 2.2744736              | 0.0579703             |
| Training_P18 | Training | 8536967               | 8289869                | 97.105553        | 73.898287              | 2.1279267                  | 1.2076427                   | 15.303933               | 0.0940445                | 2.9343578              | 0.0807291             |
| Training_P19 | Training | 6811535               | 6518277                | 95.694686        | 65.511473              | 2.3000685                  | 1.7849809                   | 21.464046               | 0.1007373                | 2.8107581              | 0.1949672             |
| Training_P20 | Training | 6670790               | 6377753                | 95.607162        | 61.295091              | 2.0375018                  | 1.7424319                   | 20.695126               | 0.1187592                | 2.7734624              | 0.1127017             |
| Training_P21 | Training | 9012390               | 8719139                | 96.746135        | 63.813778              | 3.5495707                  | 1.4078684                   | 17.158747               | 0.0775535                | 2.3228928              | 0.1241006             |
| Training_P22 | Training | 9485040               | 9199585                | 96.990471        | 58.675352              | 2.2000703                  | 1.5396129                   | 17.888796               | 0.0927524                | 2.9080026              | 0.1200453             |
| Training_P23 | Training | 9540743               | 9341317                | 97.909744        | 77.652402              | 1.7113683                  | 0.9382938                   | 11.971503               | 0.0789949                | 2.6043232              | 0.1020056             |
| Training_P24 | Training | 9717269               | 9131628                | 93.973194        | 37.911957              | 4.1267559                  | 6.2277614                   | 42.164782               | 0.1472227                | 3.5547906              | 0.0654593             |
| Training_P25 | Training | 9724480               | 9333147                | 95.975795        | 65.353234              | 2.5316532                  | 1.8556656                   | 21.239856               | 0.1000984                | 3.4969912              | 0.1689516             |
| Training_P26 | Training | 9461001               | 8953965                | 94.640779        | 27.482542              | 6.1691887                  | 7.9899352                   | 51.695847               | 0.1556582                | 3.1445641              | 0.0607608             |
| Training_P27 | Training | 8830031               | 7904391                | 89.517138        | 31.906011              | 5.0903711                  | 6.8018902                   | 51.063162               | 0.1747215                | 3.2658114              | 0.1262315             |
| Training_P28 | Training | 9517554               | 9308675                | 97.805329        | 76.198908              | 4.4416937                  | 1.086782                    | 12.827261               | 0.0954916                | 2.218163               | 0.0697092             |
| Training_P29 | Training | 8986452               | 8392802                | 93.393945        | 42.984822              | 3.7649663                  | 5.1011331                   | 37.801214               | 0.1230757                | 3.3226408              | 0.0584946             |

|              |          |          |          |           |           |           |           |           |           |           |           |
|--------------|----------|----------|----------|-----------|-----------|-----------|-----------|-----------|-----------|-----------|-----------|
| Training_P30 | Training | 15039641 | 13969091 | 92.881812 | 47.555525 | 3.6496636 | 4.4129428 | 36.302062 | 0.1423995 | 2.9772994 | 0.0921618 |
| Training_P31 | Training | 8565209  | 7962167  | 92.959401 | 36.528525 | 3.9531031 | 3.333816  | 36.144695 | 0.1357911 | 3.1794747 | 0.1259665 |
| Training_P32 | Training | 8443278  | 8001885  | 94.772256 | 59.292112 | 2.7054188 | 2.3527831 | 26.86427  | 0.1115487 | 2.713896  | 0.1187345 |
| Training_P33 | Training | 8898123  | 8507612  | 95.61131  | 51.537631 | 4.2881579 | 4.1629661 | 29.4869   | 0.1103639 | 3.070561  | 0.1220025 |
| Training_P34 | Training | 8259814  | 7697632  | 93.193769 | 52.148628 | 3.6096653 | 4.275094  | 34.633495 | 0.1447924 | 2.8920019 | 0.2507243 |
| Training_P35 | Training | 8215197  | 7599264  | 92.502517 | 40.942682 | 4.5617883 | 5.7807572 | 42.739652 | 0.1460141 | 3.0906173 | 0.1020691 |
| Training_P36 | Training | 10546827 | 9826142  | 93.166807 | 34.373664 | 4.663056  | 6.4966902 | 48.357219 | 0.1575525 | 3.3911936 | 0.0857559 |
| Training_P37 | Training | 7607870  | 7193838  | 94.557846 | 59.010502 | 3.0037281 | 2.4853354 | 27.08632  | 0.1721311 | 2.757105  | 0.1267775 |
| Training_P38 | Training | 6877268  | 6504394  | 94.578167 | 50.540686 | 3.4980481 | 2.9721908 | 31.185473 | 0.1452044 | 3.5443591 | 0.1284337 |
| Training_P39 | Training | 7978539  | 7744101  | 97.061643 | 60.1709   | 2.3663818 | 1.8844666 | 20.781044 | 0.0935658 | 2.7621067 | 0.1157698 |
| Training_P40 | Training | 8626596  | 7630493  | 88.453116 | 30.892751 | 5.1174806 | 5.4304224 | 52.045916 | 0.1611298 | 3.6091934 | 0.105334  |
| Training_P41 | Training | 8807754  | 8191165  | 92.999475 | 35.399531 | 4.510264  | 6.0783295 | 44.664233 | 0.1498322 | 3.1569166 | 0.0593872 |
| Training_P42 | Training | 8187251  | 7883123  | 96.285347 | 51.340867 | 2.8072631 | 2.1762949 | 23.527008 | 0.1157642 | 2.8456446 | 0.0827189 |
| Training_P43 | Training | 11657123 | 10958427 | 94.006274 | 52.123158 | 3.3685233 | 4.0903863 | 31.752851 | 0.185857  | 2.9839106 | 0.0735872 |
| Training_P44 | Training | 10441650 | 9397702  | 90.002078 | 25.643669 | 5.6913736 | 7.8663592 | 55.690508 | 0.1729829 | 3.1926333 | 0.0797784 |
| Training_P45 | Training | 12609717 | 11940591 | 94.693569 | 45.116026 | 4.1579502 | 5.4252842 | 37.647123 | 0.1300166 | 3.7992082 | 0.0635521 |
| Training_P46 | Training | 10296580 | 9636985  | 93.594038 | 45.179365 | 4.3349243 | 5.5300283 | 39.034127 | 0.1283847 | 2.8295978 | 0.0725884 |
| Training_P47 | Training | 9776103  | 8678220  | 88.769728 | 26.290765 | 5.7816484 | 7.8388886 | 55.315503 | 0.1687356 | 3.0946141 | 0.0700278 |
| Testing_P48  | Testing  | 8798653  | 8391964  | 95.377827 | 40.812294 | 3.8227762 | 5.5469494 | 36.934989 | 0.1439969 | 3.1561583 | 0.1634302 |
| Testing_P49  | Testing  | 6090018  | 5830626  | 95.740702 | 37.654522 | 4.8061277 | 6.421506  | 41.863515 | 0.1419116 | 3.1096861 | 0.1031822 |
| Testing_P50  | Testing  | 7113184  | 6801123  | 95.612921 | 47.304861 | 3.4059057 | 5.0827194 | 34.677347 | 0.1342229 | 3.4248229 | 0.1200782 |
| Testing_P51  | Testing  | 6995655  | 6690716  | 95.641023 | 50.504046 | 3.143616  | 4.0662165 | 30.821709 | 0.1312254 | 3.5601147 | 0.1911878 |
| Testing_P52  | Testing  | 7671052  | 7415133  | 96.663834 | 49.314861 | 2.8719939 | 3.8601331 | 26.765629 | 0.1089214 | 3.7328584 | 0.1277702 |
| Testing_P53  | Testing  | 7912879  | 7636533  | 96.507643 | 53.631546 | 3.1050216 | 4.5060239 | 30.286375 | 0.1129505 | 2.8883362 | 0.0886659 |
| Testing_P54  | Testing  | 8147273  | 7820632  | 95.990794 | 63.12943  | 4.1369888 | 3.464362  | 24.948009 | 0.0897413 | 1.9136806 | 0.0321756 |
| Testing_P55  | Testing  | 8146181  | 7826305  | 96.073301 | 47.07567  | 4.0794368 | 4.5632773 | 30.611125 | 0.1060058 | 2.6849761 | 0.0559332 |
| Testing_P56  | Testing  | 7397034  | 6884627  | 93.072805 | 40.907176 | 4.1949719 | 5.3171653 | 39.870875 | 0.1354213 | 3.5128192 | 0.1155328 |
| Testing_P57  | Testing  | 8153490  | 7708717  | 94.544999 | 46.678645 | 3.4360884 | 4.9050705 | 35.637474 | 0.1227813 | 3.4338036 | 0.1906024 |
| Testing_P58  | Testing  | 6839206  | 6441841  | 94.189896 | 30.662469 | 4.7936685 | 6.3028255 | 49.465021 | 0.1535017 | 3.7193224 | 0.0967011 |
| Testing_P59  | Testing  | 7664048  | 7334378  | 95.698487 | 53.514191 | 2.7514694 | 3.5390322 | 27.202661 | 0.110799  | 3.6921763 | 0.1820604 |
| Testing_P60  | Testing  | 8697882  | 8457393  | 97.235086 | 48.195872 | 2.1000916 | 2.7980726 | 20.974537 | 0.0773367 | 2.6077914 | 0.1098309 |
| Testing_P61  | Testing  | 9882099  | 9420815  | 95.332125 | 58.600051 | 2.5842969 | 3.8797599 | 28.063007 | 0.1040807 | 3.0382262 | 0.2735468 |

|             |         |          |          |           |           |           |           |           |           |           |           |
|-------------|---------|----------|----------|-----------|-----------|-----------|-----------|-----------|-----------|-----------|-----------|
| Testing_P62 | Testing | 6453830  | 6189655  | 95.906694 | 50.763007 | 3.4554861 | 4.6935572 | 32.914839 | 0.1163258 | 3.1482395 | 0.4345207 |
| Testing_P63 | Testing | 6071162  | 5692474  | 93.762512 | 40.623711 | 4.4076471 | 5.719341  | 42.582856 | 0.1361447 | 3.1870223 | 0.1327572 |
| Testing_P64 | Testing | 7207365  | 6548304  | 90.855729 | 53.263813 | 3.1282986 | 3.0923885 | 30.378889 | 0.117379  | 3.5576197 | 0.1357476 |
| Testing_P65 | Testing | 7728240  | 7149117  | 92.506405 | 66.18604  | 2.8675056 | 2.106442  | 22.182516 | 0.0953777 | 3.2691543 | 0.1650623 |
| Testing_P66 | Testing | 10335349 | 9718440  | 94.031077 | 64.836858 | 2.1786281 | 2.3034664 | 22.361449 | 0.0871428 | 4.016484  | 0.1640301 |
| Testing_P67 | Testing | 8842456  | 8025820  | 90.764602 | 48.307326 | 2.9329277 | 2.8245338 | 30.826719 | 0.1108599 | 3.5843793 | 0.1286598 |
| Testing_P68 | Testing | 9267396  | 8456051  | 91.245168 | 52.813731 | 2.8428696 | 2.6458568 | 28.450171 | 0.1319292 | 3.9670202 | 0.1861231 |
| Testing_P69 | Testing | 5093530  | 4722612  | 92.71786  | 49.814502 | 2.5966986 | 2.3777096 | 24.924809 | 0.1088628 | 3.457557  | 0.0725058 |
| Testing_P70 | Testing | 6837055  | 6181701  | 90.414674 | 58.689794 | 2.8401244 | 2.2817344 | 26.171842 | 0.1144682 | 3.2398459 | 0.4111759 |
| Testing_P71 | Testing | 6088264  | 5608943  | 92.127132 | 51.372831 | 3.0550438 | 2.7017746 | 28.166287 | 0.1365052 | 3.8230183 | 0.186999  |
| Testing_P72 | Testing | 7522844  | 6862122  | 91.217125 | 54.212358 | 2.9711485 | 2.7927659 | 29.600887 | 0.1249893 | 3.5260701 | 0.0781342 |
| Testing_P73 | Testing | 6108211  | 5645778  | 92.429322 | 54.833278 | 2.3707184 | 2.252887  | 24.612551 | 0.1509801 | 3.8075606 | 0.1270802 |
| Testing_P74 | Testing | 5579557  | 5153862  | 92.370452 | 55.26582  | 3.0230372 | 3.2176259 | 30.479939 | 0.1293706 | 3.6387147 | 0.149713  |
| Testing_P75 | Testing | 5725124  | 5384489  | 94.050173 | 52.880636 | 2.543618  | 2.6856959 | 25.167198 | 0.1538215 | 3.5095299 | 0.1554744 |
| Testing_P76 | Testing | 5464800  | 4902942  | 89.718599 | 50.100464 | 3.4788568 | 3.0789677 | 31.778308 | 0.1131504 | 3.7703356 | 0.1304761 |
| Testing_P77 | Testing | 5953024  | 5290497  | 88.870749 | 59.337926 | 2.8680607 | 2.2738317 | 27.316432 | 0.1316385 | 3.3165992 | 0.2445233 |
| Testing_P78 | Testing | 7977749  | 7557868  | 94.736849 | 67.293915 | 2.2059859 | 1.8947671 | 20.276419 | 0.078662  | 3.2441865 | 0.140604  |
| Testing_P79 | Testing | 8188578  | 7821221  | 95.513788 | 72.776438 | 1.5802285 | 1.3423607 | 15.144132 | 0.0867362 | 3.425843  | 0.1197916 |
| Testing_P80 | Testing | 5713940  | 5186723  | 90.773144 | 50.773934 | 3.6543241 | 3.2791418 | 31.989505 | 0.1190524 | 3.1317221 | 0.2225908 |
| Testing_P81 | Testing | 5168901  | 4387355  | 84.879842 | 45.75506  | 3.7811772 | 3.2921202 | 36.948572 | 0.1460086 | 3.8450046 | 0.2219257 |
| Testing_P82 | Testing | 5561755  | 5280336  | 94.940104 | 40.575467 | 6.1206837 | 5.4475511 | 39.878618 | 0.130118  | 2.685492  | 0.2003471 |
| Testing_P83 | Testing | 7540631  | 7096751  | 94.11349  | 54.593979 | 2.8465679 | 2.7261912 | 26.129816 | 0.1038362 | 4.9407433 | 0.1542419 |
| Testing_P84 | Testing | 5721595  | 5216472  | 91.17164  | 50.115698 | 3.5680277 | 3.4611324 | 32.239644 | 0.1126208 | 3.682933  | 0.2723552 |
| Testing_P85 | Testing | 6087467  | 5492993  | 90.23446  | 44.745667 | 3.4382895 | 3.5460631 | 34.513734 | 0.1331059 | 3.6286031 | 0.1739337 |
| Testing_P86 | Testing | 7315514  | 7028738  | 96.079893 | 65.986238 | 1.4481476 | 1.3810018 | 14.288753 | 0.1112243 | 3.7268023 | 0.1221675 |
| Testing_P87 | Testing | 11246754 | 10094139 | 89.751576 | 62.356387 | 2.3287771 | 1.9493887 | 23.471036 | 0.0964421 | 4.414646  | 0.2749137 |
| Testing_P88 | Testing | 10416017 | 9961098  | 95.632505 | 50.394497 | 3.3892549 | 4.0312022 | 32.323706 | 0.1188231 | 4.2458112 | 0.1168178 |
| Testing_P89 | Testing | 8236835  | 7948590  | 96.500537 | 55.322771 | 2.7539109 | 3.4672313 | 25.304186 | 0.1013513 | 3.0241894 | 0.1310379 |
| Testing_P90 | Testing | 7917555  | 7745275  | 97.824076 | 49.731828 | 3.1811653 | 4.453399  | 31.017595 | 0.1112054 | 3.2454088 | 0.1107966 |
| Testing_P91 | Testing | 6631221  | 6351325  | 95.779118 | 42.649361 | 3.5324781 | 5.2917147 | 34.718378 | 0.1190959 | 3.6113003 | 0.1171094 |
| Testing_P92 | Testing | 5828762  | 5434153  | 93.229969 | 37.105704 | 4.1778023 | 5.883824  | 41.883455 | 0.1417348 | 3.9539511 | 0.1874472 |
| Testing_P93 | Testing | 6222768  | 5829665  | 93.682827 | 48.08434  | 3.4364868 | 4.5273442 | 34.401188 | 0.1230631 | 3.4495621 | 0.1441421 |



|              |         |          |          |           |           |           |           |           |           |           |           |
|--------------|---------|----------|----------|-----------|-----------|-----------|-----------|-----------|-----------|-----------|-----------|
| Testing_P94  | Testing | 8361269  | 7931636  | 94.861629 | 47.586095 | 3.2820593 | 3.9225829 | 33.91516  | 0.1134591 | 3.3948408 | 0.0963357 |
| Testing_P95  | Testing | 7572777  | 7152678  | 94.452511 | 48.32135  | 3.1266751 | 4.354439  | 32.236513 | 0.1348155 | 3.4128464 | 0.1199551 |
| Testing_P96  | Testing | 5702259  | 5420285  | 95.055048 | 28.988302 | 5.0835396 | 7.3789109 | 49.590769 | 0.1616797 | 3.3223791 | 0.0789411 |
| Testing_P97  | Testing | 6610880  | 6208939  | 93.920008 | 32.121629 | 4.730105  | 6.9114063 | 47.856453 | 0.1668374 | 3.1744299 | 0.1226135 |
| Testing_P98  | Testing | 6601956  | 6202312  | 93.946582 | 29.546358 | 5.522532  | 7.4201846 | 50.495864 | 0.2000517 | 2.923602  | 0.0666579 |
| Testing_P99  | Testing | 6378678  | 5938977  | 93.106706 | 31.878481 | 4.7458089 | 6.1098906 | 48.334604 | 0.1827868 | 3.5384152 | 0.1377145 |
| Testing_P100 | Testing | 6906790  | 6601317  | 95.577207 | 48.591972 | 2.7283722 | 3.5130263 | 26.581968 | 0.1049589 | 3.2326201 | 0.1542697 |
| Testing_P101 | Testing | 12112806 | 11040357 | 91.146156 | 52.948644 | 2.555097  | 2.1565335 | 24.991275 | 0.1112789 | 4.6550216 | 0.4254814 |
| Testing_P102 | Testing | 17877526 | 16345415 | 91.429961 | 57.885558 | 2.9464328 | 1.9318017 | 23.921944 | 0.1321737 | 4.0641912 | 0.3041719 |
| Testing_P103 | Testing | 9700641  | 8362116  | 86.201685 | 51.646968 | 3.6236382 | 2.7513969 | 32.173448 | 0.1202865 | 4.0092025 | 0.1684163 |
| Testing_P104 | Testing | 11180702 | 9938137  | 88.886521 | 40.701934 | 3.8412431 | 3.9040315 | 38.81798  | 0.162247  | 3.8225935 | 0.1479872 |
| Testing_P105 | Testing | 13826070 | 12902715 | 93.321638 | 57.585715 | 2.3800546 | 1.9469778 | 22.910791 | 0.0967477 | 4.7231326 | 0.2696861 |
| Testing_P106 | Testing | 14142420 | 13126680 | 92.817778 | 55.315315 | 3.2480477 | 2.3760616 | 27.092068 | 0.1062931 | 4.2354756 | 0.3015284 |
| Testing_P107 | Testing | 13853107 | 13372137 | 96.528071 | 26.393347 | 1.6428283 | 1.3065376 | 14.684302 | 0.0745194 | 2.0001048 | 0.0283463 |
| Testing_P108 | Testing | 12410136 | 11915628 | 96.015289 | 25.278224 | 2.2364271 | 1.3714342 | 16.013164 | 0.0973903 | 2.3386304 | 0.0577169 |
| Testing_P109 | Testing | 13862046 | 12715028 | 91.725478 | 62.216553 | 2.5854904 | 1.8185096 | 23.150763 | 0.0946649 | 3.4905809 | 0.2130104 |
